# **PDE9 Inhibition Activates PPAR $\alpha$ to Stimulate Mitochondrial Fat Metabolism and Reduce Cardiometabolic Syndrome**

Short title: PDE9 inhibition and Obesity-Cardiometabolic Syndrome

Summary: Oral inhibition of phosphodiesterase type 9 stimulates mitochondrial fat metabolism and lipolysis, reducing central obesity without changing appetite

Sumita Mishra<sup>1</sup>, Virginia S. Hahn<sup>1</sup>, Nandhini Sadagopan<sup>1</sup>, Brittany Dunkerly-Ering<sup>1</sup>,  
Susana Rodriguez<sup>2</sup>, Dylan C. Sarver<sup>2</sup>, Ryan P. Ceddia<sup>5</sup>, Sean Murphy<sup>1</sup>,  
Hildur Knutsdottir<sup>4</sup>, Vivek Jani<sup>1,3</sup>, Deepthi Ashoke<sup>1</sup>, Christian U. Oeing<sup>1</sup>,  
Brian O'Rourke<sup>1</sup>, Kavita Sharma<sup>1</sup>, Jon Gangoit<sup>7</sup>, Dorothy D. Sears<sup>8,9</sup>,  
G. William Wong<sup>2</sup>, Sheila Collins<sup>5,6</sup>, David A. Kass<sup>1,3,4</sup>

1) Division of Cardiology, Department of Medicine

2) Department of Physiology

3) Department of Biomedical Engineering

4) Department of Pharmacology and Molecular Sciences

The Johns Hopkins University and School of Medicine, Baltimore, MD, 21205

5) Division of Cardiovascular Medicine, Department of Medicine

6) Department of Molecular Physiology and Biophysics

Vanderbilt University, Nashville TN 37232

7) UCSD Biochemical Genetics and Metabolomics Laboratory;

8) Department of Medicine, UC San Diego, La Jolla, CA 92093

9) College of Health Solutions, Arizona State University, Phoenix, AZ 85004

Address Correspondence:

David A. Kass, M.D.

Division of Cardiology, Ross 858

Johns Hopkins Medical Institutions

720 Rutland Avenue, Baltimore MD 21205

(410) 955-7153

[dkass@jhmi.edu](mailto:dkass@jhmi.edu) // @dkasslab

## ABSTRACT

Central obesity with cardiometabolic syndrome (CMS) is a major global contributor to human disease, and effective therapies are needed. Here, we show inhibiting cyclic-GMP selective phosphodiesterase-9A (PDE9-I) suppresses established diet-induced obesity and CMS in ovariectomized female and male mice. PDE9-I reduces abdominal, hepatic, and myocardial fat accumulation, stimulates mitochondrial activity in brown and white fat, and improves CMS, without altering activity or food intake. PDE9 localizes to mitochondria, and its inhibition stimulates lipolysis and mitochondrial respiration coupled to PPAR $\alpha$ -dependent gene regulation. PPAR $\alpha$  upregulation is required for PDE9-I metabolic efficacy and is absent in non-ovariectomized females that also display no metabolic benefits from PDE9-I. The latter is compatible with estrogen receptor- $\alpha$  altering PPAR $\alpha$  chromatin binding identified by ChIPSeq. In humans with heart failure and preserved ejection fraction, myocardial expression of *PPARA* and its regulated genes is reduced versus control. These findings support testing PDE9-I to treat obesity/CMS in men and postmenopausal women.

## INTRODUCTION

Nearly one out of every five humans around the globe is obese(1), and in the United States this proportion exceeds 40% (2). The pandemic has already had a major impact on global health as obesity increases the risks for diabetes, dyslipidemia, non-alcoholic fatty liver disease, inflammatory syndromes, heart failure, and hypertension, all components of cardiometabolic syndrome (CMS)(1, 3, 4). Human studies have shown abdominal (visceral) obesity is most pathogenic(5), whereas metabolically active adipose tissue known as brown fat appears to be protective(6). Obesity-related disorders exhibit a sexual dimorphism as premenopausal women are relatively protected largely due to estrogen(7, 8), yet after menopause when visceral fat increases, so do the risks for developing CMS(9, 10). Obesity is now a defining feature of a common syndrome known as heart failure with preserved ejection fraction or HFpEF(9, 11), which has high morbidity and little effective therapy (10, 12). Shortly after the international spread of a novel Sars-COV2 coronavirus (COVID-19) in early 2020, obesity quickly emerged as an independent risk factor for worse disease and mortality with many of the mechanisms proposed being identical to those highlighted in CMS(13). Despite its broad impact on human disease, effective obesity treatments remain limited. While diet and exercise are important, their impact is often limited in severely obese individuals given their low basal metabolic rates and exertional incapacity. Diabetes therapies such as glucagon-like

peptide-1 agonists and sodium-glucose co-transporter-2 antagonists are being tested, but methods that stimulate fat catabolism and target visceral fat remain lacking.

An intrinsic lipolytic pathway is one coupled to cyclic GMP-protein kinase G (PKG) signaling stimulated by natriuretic peptides (NP) synthesized by the heart, or by nitric oxide. PKG is the primary kinase effector of cGMP and it phosphorylates hormone sensitive lipase (HSL) and perilipin, stimulates mitochondrial biogenesis and oxidative activity, and improves insulin signaling to suppress diet-induced obesity (*14, 15*). Cyclic GMP also results in increased expression and activity of peroxisome proliferator activator-receptor alpha (PPAR $\alpha$ )(*16*), a master controller of mitochondrial fatty acid metabolism/oxidation and inducer of thermogenic (browning of) adipose tissue. PKG can be exogenously activated either by stimulating cGMP synthesis or suppressing its hydrolysis via specific phosphodiesterases (PDEs), and while there is shared downstream signaling, there are also many differences due to intra-cellular compartmentation and cell/organ specificity(*17*). Stimulatory approaches include exogenous natural or synthetic NPs (*18*), nitrates/nitrites(*19*), and direct soluble guanylate cyclase stimulators(*20*). However, each has limitations for chronic obesity therapy as they act rapidly, are short-lived and can potently lower blood pressure from vasodilation. NPs must also be injected.

PKG can also be stimulated by blocking cGMP-selective PDEs. The best-known example is PDE5 inhibition currently used to treat erectile dysfunction and pulmonary hypertension. PDE5-I also ameliorates cardiac pressure-overload(*21*) and is also reported

to stimulate fat metabolism and induce metabolic activation of adipose tissue(22).

However, studies show this PDE primarily modulates NO-dependent cGMP, and when this signaling is diminished as occurs in females lacking estrogen, the impact of PDE5 inhibition is also very reduced(23). Given most women with obesity-CMS are postmenopausal, this poses a major limitation. PDE9 is the other highly cGMP-selective PDE, and its inhibitors improve hearts subjected to pathological pressure-overload(24, 25), hemodynamics and renal function in dilated heart failure(26), and diastolic dysfunction(27). While not yet approved in humans, several PDE9 inhibitors are currently in clinical trials for neurocognitive disease and heart failure. Unlike PDE5, PDE9 regulates NO-independent cGMP(24, 28). PDE9 is expressed in adipose tissue, liver, and hearts of mammals including humans (24, 29), though less so in systemic arteries, and its inhibition has little effect on blood pressure in animals(24, 27) and humans. However, the role of PDE9 in regulating fat metabolism and the potential for selective inhibitors to counter obesity and/or CMS are unknown.

Accordingly, the present study tested the capacity of a highly selective PDE9-I (PF-04447943) previously tested in humans with Alzheimer's Disease(30) to counter diet-induced morbid obesity and CMS. We particular studied effects in females lacking estrogen and males, as these are the main groups impacted by this syndrome. In both, we find PDE9 inhibition reduces obesity and lipid accumulation in multiple tissues, the enzyme localizes to mitochondria and its inhibition stimulates mitochondrial respiration

and fatty acid oxidation in conjunction with PPAR $\alpha$  stimulation. We also find a sexual dimorphism, as obese intact females lack PDE9-I associated increases in PPAR $\alpha$ -regulated genes and have no change in obesity-CMS.

## RESULTS

### *Model of Combined Severe Diet-induced Obesity with Cardio-Metabolic Syndrome*

To test the impact of PDE9-I on obesity-CMS, we subjected C56BL6/N mice to diet-induced obesity (DIO) for 6 months, with mild mechanical cardiac pressure-stress superimposed starting at month 5 and a week later, randomizing them to either PDE9-I or placebo (vehicle) treatment (Figure 1a). In OVX females, DIO resulted in substantial weight gain (100-200% over baseline) similar to that found in males (Figure S1a), and reflecting severe obesity (equivalent to a body mass index (BMI) >35 kg/m<sup>2</sup> in humans). These mice had marked abdominal fat accumulation (Figure S1b), glucose intolerance (Figure S1c), and hepatic steatosis (Figure S1d).

### *PDE9-I lowers obesity and improves CMS in OVX-female and male mice*

Using this obesity-CMS model, we tested the impact of PDE9-I on total body fat and lean mass and metabolic dysregulation in OVX females. Mice receiving placebo

continued to gain weight (median 22%) during the 8-week trial, whereas PDE9-I treated mice exhibited a net -5.6% weight decline ( $p=2\cdot 10^{-6}$ , Fig 1b). Of the 23 mice treated with PDE9-I, 14 (61%) experienced a 2% or greater decline in body weight versus 1/20 (5%) in placebo ( $p<0.0001$ ). MR body composition analysis revealed that PDE9-I treated mice had less total fat mass (primarily abdominal) and unaltered lean mass (Figure 1c), and less inguinal (subcutaneous) and gonadal (visceral) fat pad mass (Figure 1d). Metabolic defects including elevated fasting blood glucose, triglycerides, and cholesterol that were present in the placebo group were all reduced with PDE9-I (Figure 1e). Hepatic steatosis and liver mass were greater in OVX placebo-treated mice but were at near-normal levels with PDE9-I in both OVX (Figure 1f, Figure S2a, S2b) and male (Figure S2c) mice. Importantly, PDE9-I did not significantly change food intake or activity level over placebo control. However, total body O<sub>2</sub> consumption and CO<sub>2</sub> production were significantly greater in PDE9-I treated mice (Figure 1g) without a change in core temperature (Figure S2d).

Age-matched males subjected to the same obesity/CMS model and then treatment protocol also displayed lower total body weight primarily due to reduced fat mass (Figure S3a,S3b) and less dyslipidemia (Figure S3c) when provided PDE9-I. PDE9-I also did not significantly alter food intake or activity but increased both body O<sub>2</sub> consumption and CO<sub>2</sub> production in males (Figure S3d) as it did in OVX females.

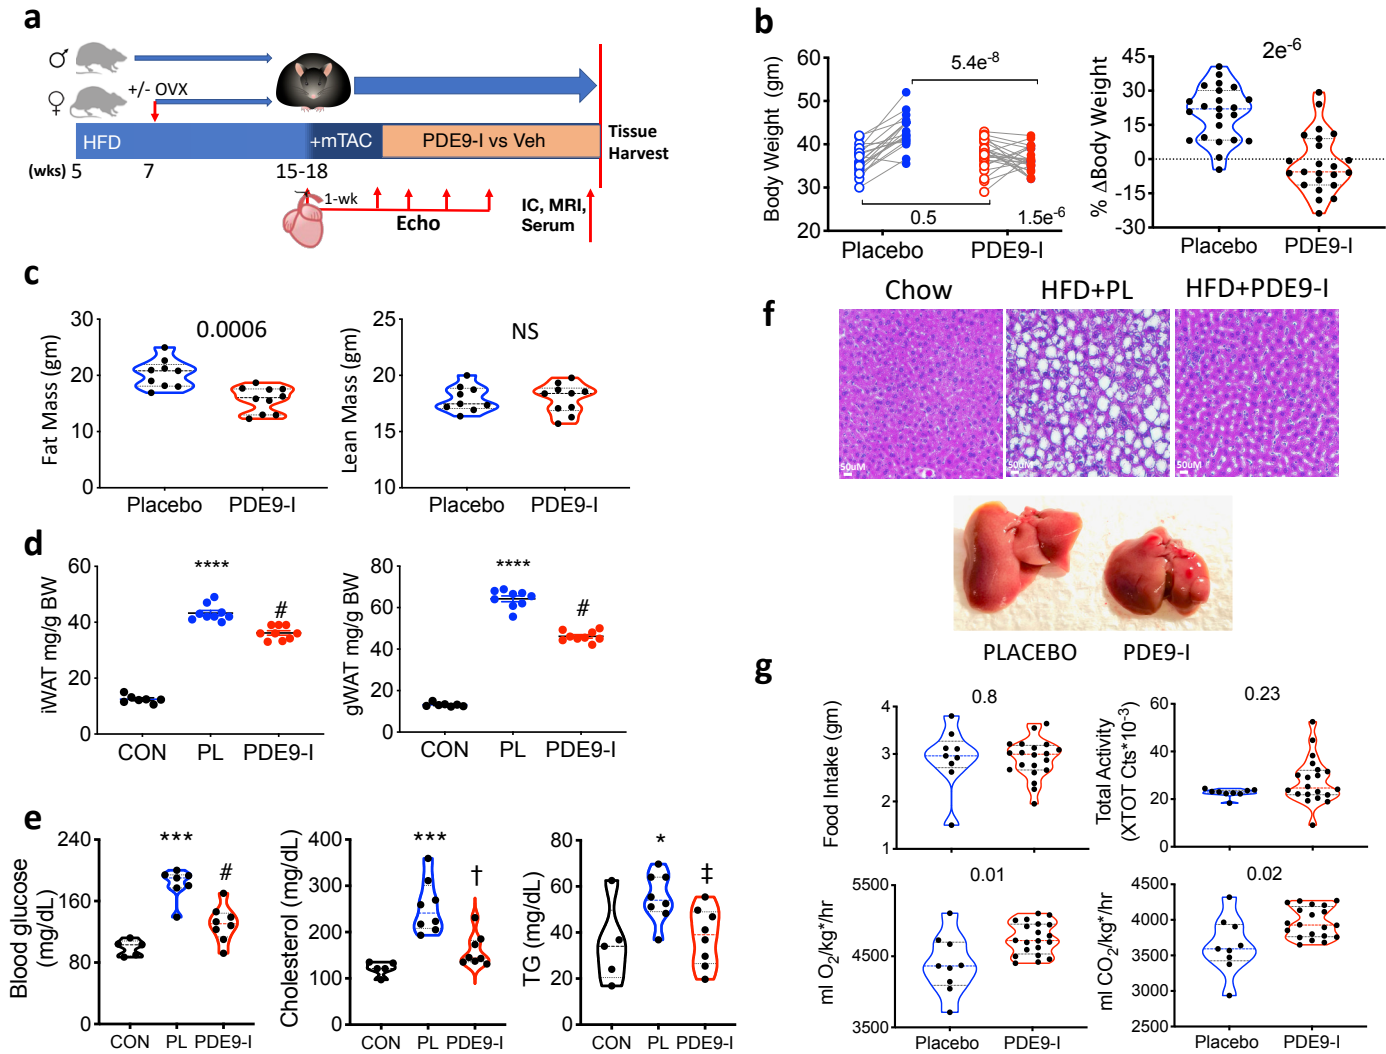

**Figure 1**



**Figure 1. PDE9-inhibition suppresses diet-induced obesity and metabolic defects in ovariectomized females with cardiometabolic syndrome.** **a)** Scheme of the protocol used to generate cardiometabolic syndrome: high-fat diet. (HFD), +/- ovariectomy (OVX) in females, subsequent mild aortic constriction (mTAC) to increase cardiac load, and lastly placebo-controlled p.o. PDE9-I drug trial (PF-04447943). IC – indirect calorimetry, MRI – magnetic resonance imaging for body fat-lean tissue, EC – echocardiogram, Veh-vehicle. **b) Left** Body mass in OVX mice before and after 8-wks of placebo (n=19) or PDE9-I (n=23) treatment (2WANOVA, with Sidaks multiple comparison). **Right:** Percent change in body mass between time points. (Mann Whitney, MW test). **c)** Magnetic resonance imaging-derived total body fat and lean mass for two treatment groups in OVX mice. (p-values, MW). **d)** Inguinal (iWAT) and gonadal (gWAT) white adipose tissue weight in OVX females treated with placebo or PDE9-I (n=7-9/group, KW, Dunns multiple comparisons test (DMCT); \*\*\*\* p=0.00001 vs normal diet control (CON), # p=0.028 vs placebo). **e)** Serum fasting blood glucose and lipids in OVX mice on control versus HFD +/- PDE9-I; (ANOVA, Holm Sidak (HS) comparisons test, \*\*\* p=0.0004, \* p=0.03 vs CON; # p=0.03, †p=0.037, ‡ p=0.047 vs Placebo (PL)). **f) Upper:** Representative liver histology in OVX with standard diet (Chow) or HFD with placebo vs PDE9-I. Marked steatosis was seen with placebo treatment that reverted to near normal by PDE9-I. (replicated n=5/group). **Lower** Examples of whole liver showing a marked reduction of liver mass by PDE9-I. Group results in Figure S2a. **g)** Food intake, activity, and whole-body respiration in OVX mice +/- PDE9-I; (MW). O<sub>2</sub> and CO<sub>2</sub> consumption/production rates are normalized to mass kg\* = (lean mass + fat mass\*0.2) as described(31).

***PDE9-I improves cardiac function, and blunts hypertrophy/fibrosis gene expression and augments myocardial PPAR $\alpha$ -signaling relative to placebo in obese-CMS mice***

Prior studies have shown PDE9 counters cardiac hypertrophy and depresses pro-fibrotic signaling cascades in non-obese males subjected to pressure-load stress, and this efficacy is independent of NO-signaling(24). Whereas PDE5A-I does not augment myocardial cGMP in OVX females(23, 32), here we show PDE9-I does (Figure S4a), and this suggested it might also counter cardiac stress in our model. PDE9-I improved ejection fraction over placebo in OVX mice (Figure 2a,  $p=0.001$  for drug/group interaction) and attenuated a significant rise in LV mass with placebo ( $p=0.005$  for interaction). Similar effects were observed in males (Figure S4b). Diastolic function was impaired in the OVX placebo group and this improved to lean control levels with PDE9-I (Figure 2b). PDE9-I also lowered pro-hypertrophic and pro-fibrotic related gene expression compared with placebo in OVX females and males (Figure 2c, Figure S4c).

Increased dietary nitrate is reported to enhance fatty acid (FA) oxidation by increasing the expression of PPAR $\alpha$  and associated downstream signaling to augment mitochondrial respiration and fat metabolism(16). To see if PDE9-I triggers a similar cascade, we first performed a targeted PCR-array analysis of heart tissue finding an abundance of transcripts for PPAR $\alpha$  and many of its target FA-regulating genes increased (Figure 2d). Cyclic GMP increased PPAR $\alpha$  promoter activity in Hep G2 (liver) cells in a dose-dependent manner (Figure 2e). Concordantly, PPAR $\alpha$  mRNA increased in

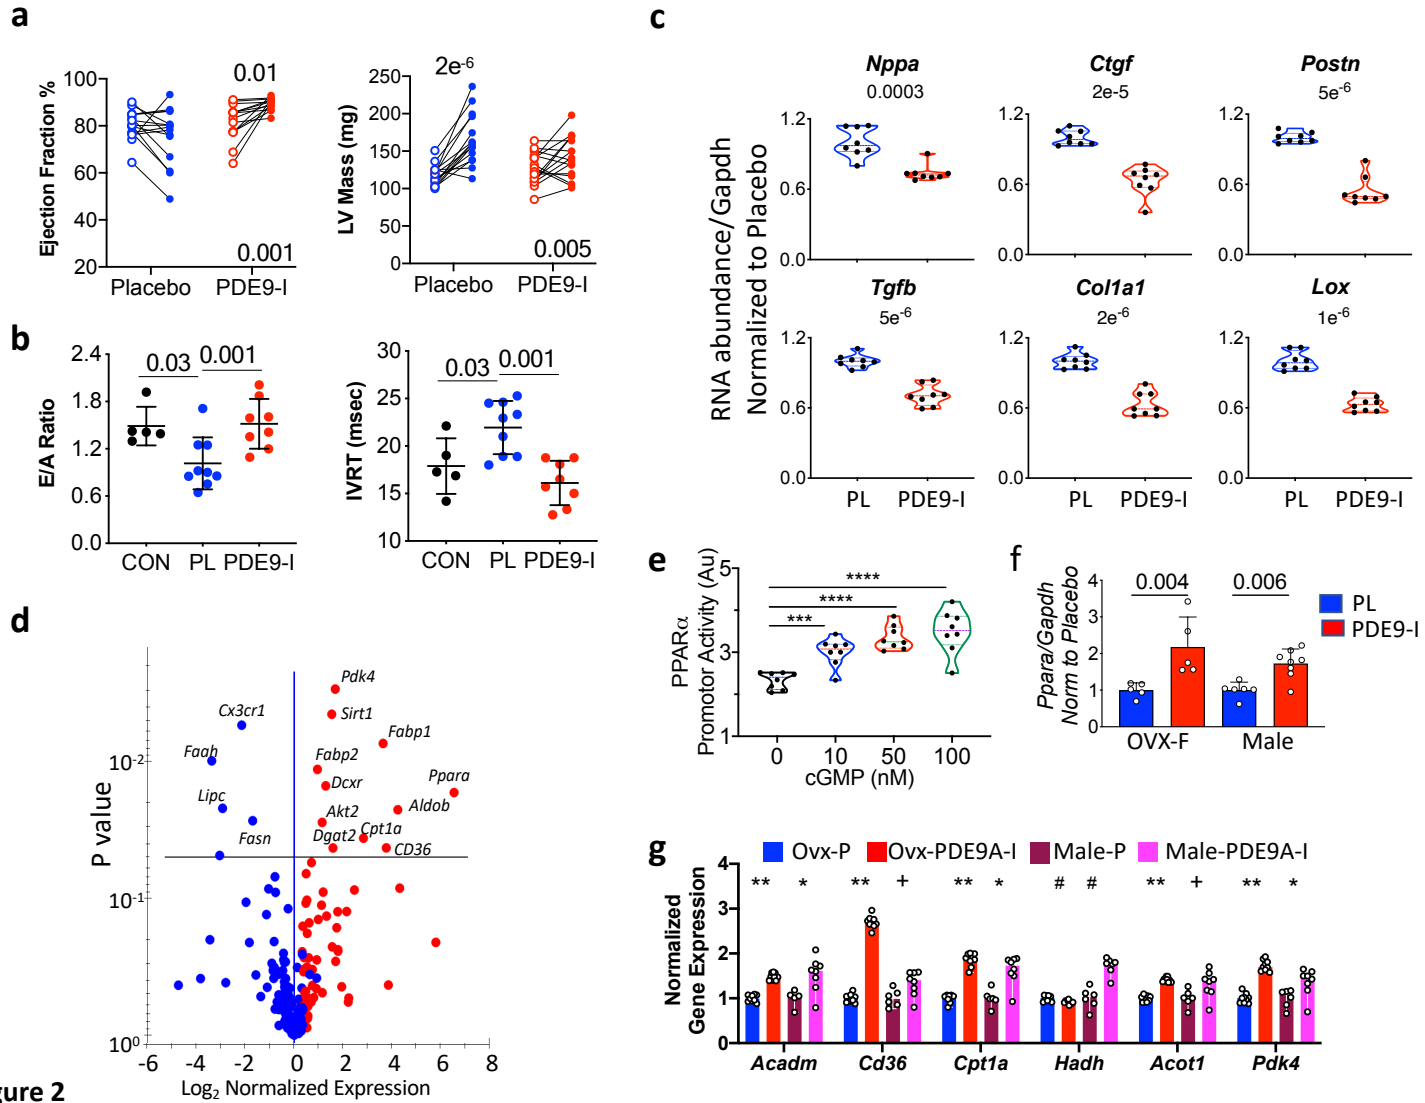

Figure 2

**Figure 2. PDE9-I improves cardiac function, suppress pathological hypertrophic gene expression, and stimulates PPAR $\alpha$  signaling in OVX myocardium.** **a)** Left ventricular ejection fraction and left-ventricular (LV) mass in placebo vs PDE9-I treated OVX mice, with paired data at onset of end of 8 wk treatment period (n=15,16 for placebo; PDE9-I; RMANOVA, p-value lower right for treatment x time interaction, above for post-hoc Tukey test within group comparisons). **b)** Diastolic function assessed by mitral filling ratio (early/atrial; E/A) and isovolumic relaxation time (IVRT) in normal diet controls (CON), and obese-CMS OVX mice treated with placebo (PL) or PDE9-I. n=5-9/group, Kruskal Wallis, Dunns post-hoc comparison. **c)** mRNA abundance normalized to *Gapdh* for A-type natriuretic peptide (*Nppa*), transforming growth factor beta (*Tgfb*), collagen type 1a1 (*Coll1a1*), lysyl oxidase (*lox*), connective tissue growth factor (*ctgf*) and periostin (*postn*) in OVX myocardium, (8/group, Mann Whitney t-test). **d)** Volcano plot of differential gene expression in OVX myocardium between placebo and PDE9-I treatment, using lipid and carbohydrate metabolism PCR array. Benjamini-Hochberg adjusted p-value versus log-2 fold change is shown (n=10/group). **e)** Activation of PPAR $\alpha$  promoter by cGMP in Hep G2 cells; (n=8/group, ANOVA, Holm Sidak comparisons test; \*\*\* p=0.007; \*\*\*\* p $\leq$ 2e<sup>-6</sup>). **f)** PPAR $\alpha$ /*Gapdh* gene expression in brown adipose tissue (BAT) from obese-CMS OVX and males treated with placebo versus PDE9-I. (2-step Benjamini, Krieger, Yekutieli multiple comparisons KW test (2-St-BKY-MC-KW) test, q-values shown) **g)** PPAR $\alpha$ -regulated fatty-acid metabolism genes expressed in myocardium in OVX and male mice with placebo (P; n=9,6) or PDE9-I (n=9,8); 2-St-BKY-MC-KW. Q-values: \*\* p=0.00005; # p=0.008; + p=0.03; \* p=0.02 vs placebo).

the myocardium of OVX and male mice treated with PDE9-I (Figure 2f). Myocardial PPAR $\alpha$  activity was assessed by mRNA abundance of regulated genes involved with FA metabolism. This increased in both OVX and male mice (Figure 2g). Metabolite profiling for myocardial acylcarnitines revealed greater levels primarily of long-chain FA in both OVX and male mice receiving placebo as compared to controls. These levels were less in both PDE9-I treated groups (Figure S4d). Collectively these results show PDE9-I ameliorates cardiac dysfunction and remodeling, reduces pro-fibrotic signaling, and enhances FA metabolism in concert with increased PPAR $\alpha$  signaling.

### ***PDE9-I induces adipose tissue browning and enhances fatty acid catabolism***

Activation of FA oxidation by PPAR $\alpha$  manifests in brown (BAT) and white (WAT) adipose tissue by increased mitochondria biogenesis and fat oxidation. Figure 3a shows example histology of BAT from a non-obese control and obese OVX and male mice treated with placebo or PDE9-I. BAT from lean mice has a darker color due to small lipid droplets and increased mitochondria density (left panel). With obesity-CMS, BAT adipocytes in placebo-treated OVX and males were enlarged with more lipid storage (pale color). This appearance was much closer to normal with PDE9-I. BAT from PDE9-I treated mice also had increased mRNA abundance of multiple genes regulating FA metabolism and mitochondrial respiration (Figure 3b) accompanied by a marked decline in acylcarnitines to levels found in lean controls (Figure 3c). Genes regulating mitochondrial biogenesis increased consistent with fat browning (Figure 3d). PDE9-I

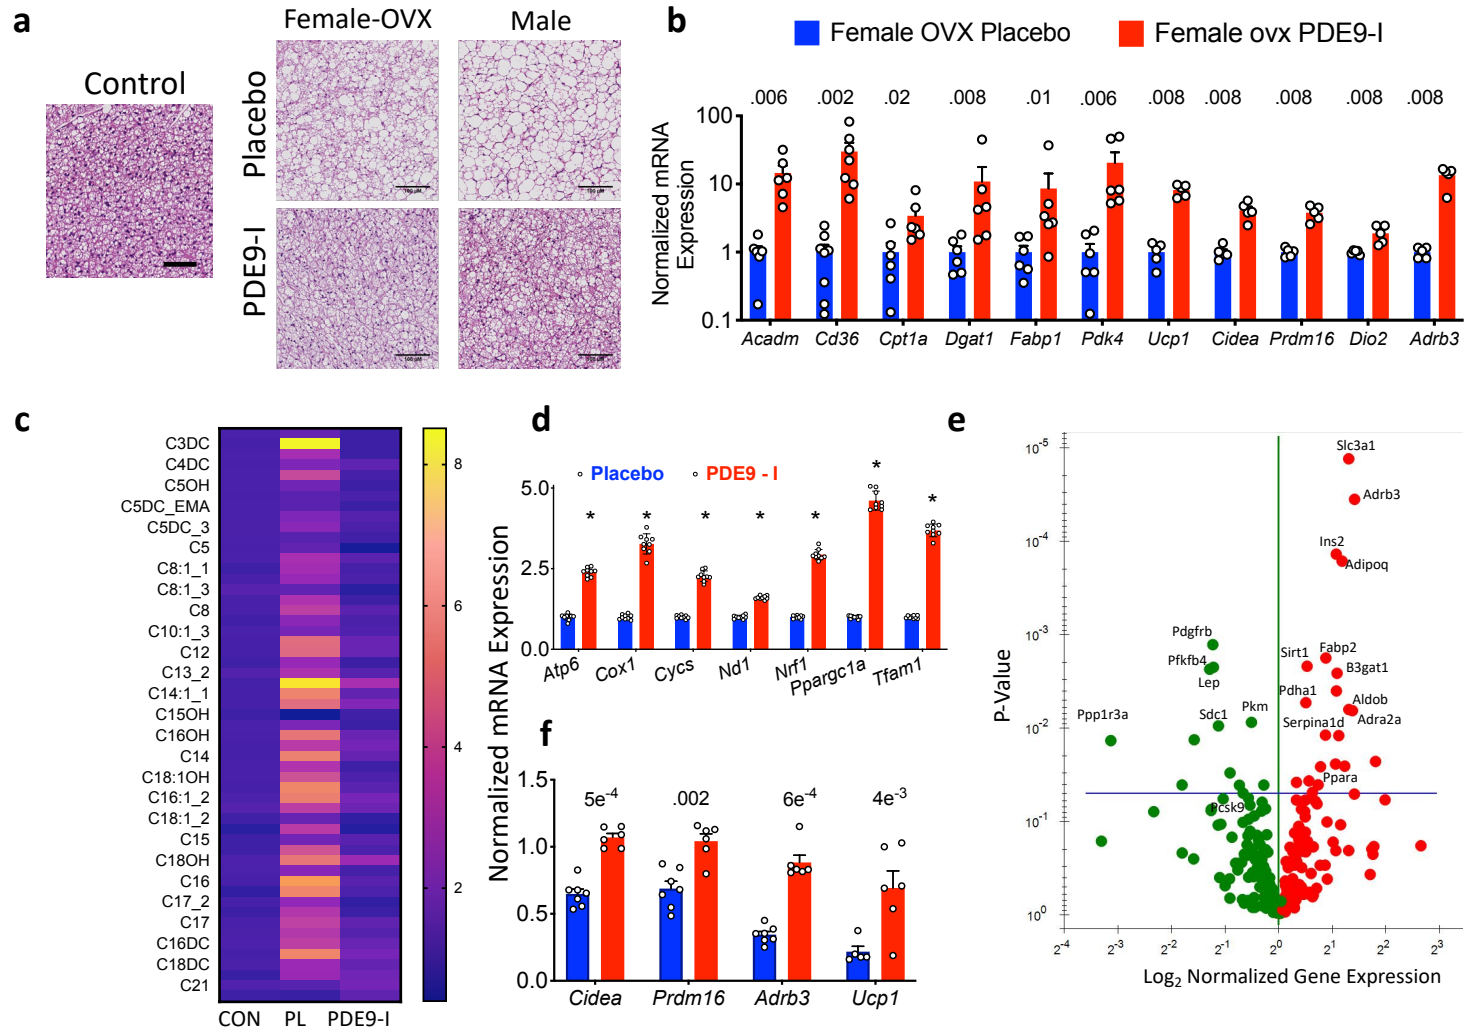

Figure 3

**Figure 3. PDE9-I reduces multi-organ lipid accumulation by enhancing lipolysis and mitochondrial respiration.** **a)** Representative histology of brown fat in a normal control (left), and obese-CMS OVX mice after placebo or PDE9-I treatment (replicated n=7/group; scale bar 100  $\mu$ m). **b)** BAT mRNA abundance for fat metabolism and mitochondrial respiration genes in OVX mice treated with placebo or PDE9-I. 2-St-BKY-MC-KW q-values shown. **c)** Metabolomic analysis of acylcarnitines in BAT from OVX obese-CMS mice with placebo (PL) or PDE9-I treatment. N=5 per group, 2-St-BKY-MC with Mann Whitney test, all p values <0.008). **d)** mRNA abundance of mitochondrial biogenesis and oxidative activity genes in BAT from OVX with PL or PDE9-I. n=9/group, \*  $q < 1e^{-11}$  between groups, same analysis as for panel **b**. **e)** Volcano plot of differential gene expression for lipid metabolism PCR array in WAT tissues from OVX model treated with PDE9-I versus placebo. Benjamini-Hochberg adjusted p-value versus log-2-fold change is shown (n=8/group). **f)** mRNA abundance of mitochondrial oxidative genes in WAT from OVX treated with placebo or PDE9-I. (n=5-7/group, same stats as in S3b).

treatment also enhanced expression of FA metabolism regulating genes in WAT (Volcano plot, Figure 3e) and in genes controlling mitochondrial respiration and uncoupling (Figure 3f). These results show PDE9-I activates adipocyte catabolic and thermogenic programs reversing abnormalities due to severe obesity.

### ***PDE9-I directly stimulates fat lipolysis and increases mitochondrial respiration***

The decline in adipose tissue and hepatic fat infiltration by PDE9-I suggests it can stimulate lipolysis in multiple cell types. In cardiomyocytes pretreated with vehicle or PDE9-I and then fed FFA for 48 hours, PDE9-I resulted in reduced intra-cellular lipid accumulation (Figure 4a, 4b). Using a glycerol release assay, we found PDE9-I alone induces lipolysis in differentiated adipocytes (Figure 4c). Dose-dependent increases in glycerol release by PDE9-I were also observed in liver Hep G2 cells and cardiomyocytes, but this required ANP co-stimulation. Enhanced lipolysis by PDE9-I was blocked by co-inhibition of PPAR $\alpha$  (Figure 4d). In addition, the PDE9-I effect was negated in cells pre-incubated with *PDE9* siRNA confirming selectivity of the pharmacological inhibitor.

Diet induced obesity increases triglyceride storage in multiple tissues causing lipotoxicity that can alter mitochondrial architecture and function, inducing swelling with reduced cristae density (33, 34). EM revealed such mitochondrial changes as well as myocardial lipid accumulation in both OVX and male mice treated with placebo, and both features improved with PDE9-I (Figure 4f, Figure S5a, S5b). Together, these data



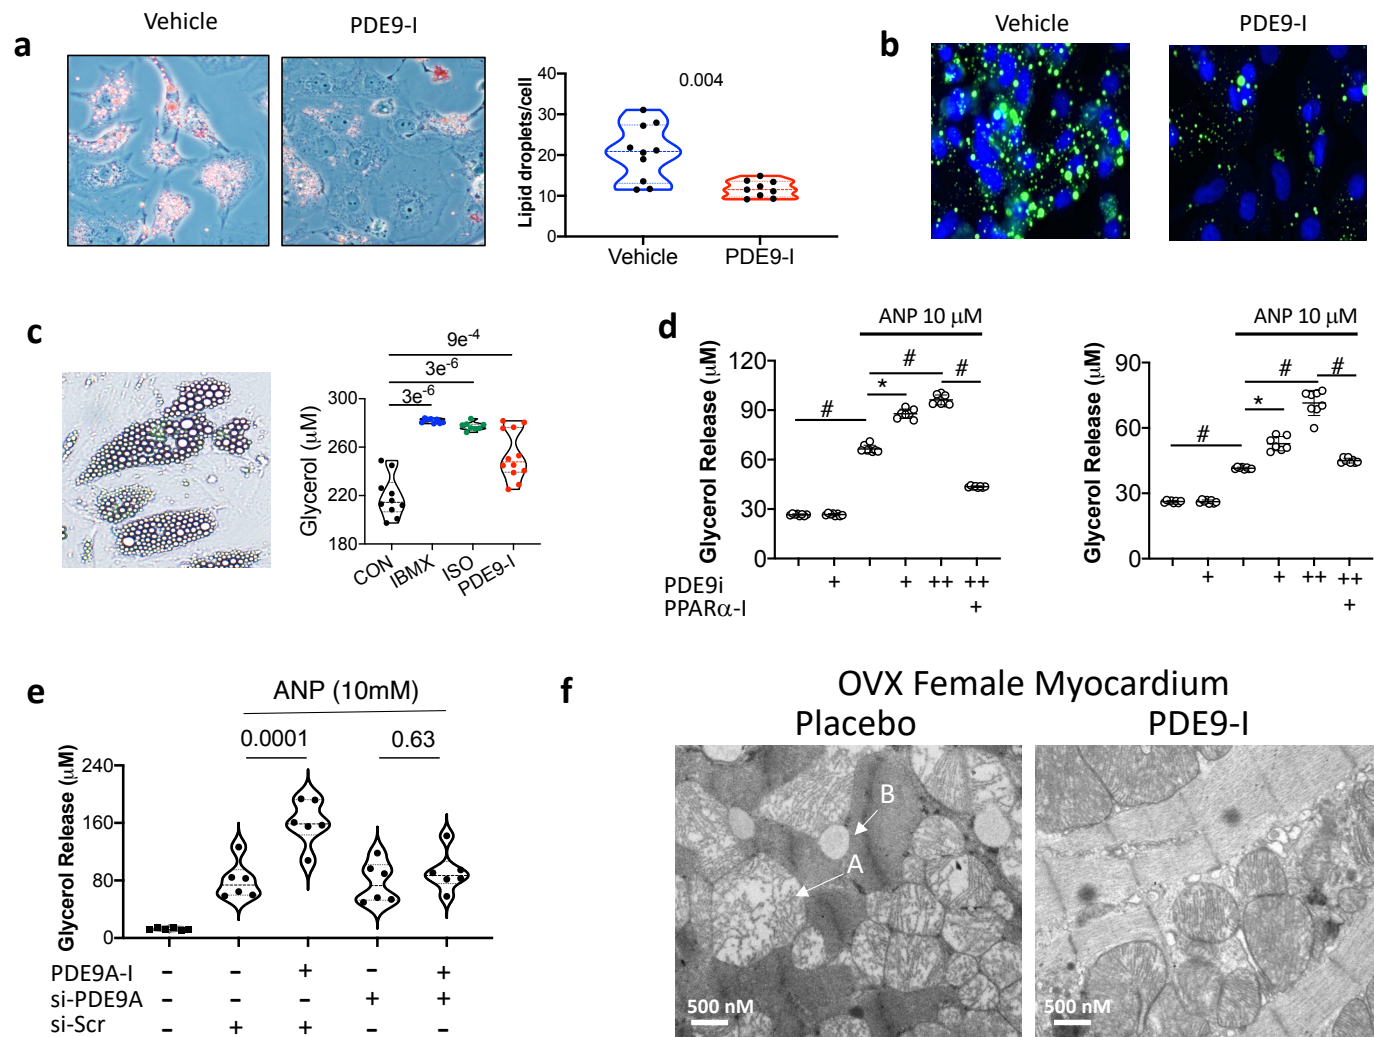

**Figure 4**

**Figure 4. PDE9-I increases lipolysis in fat, liver and myocardium.** **a)** Phase contrast microscopy with Oil Red-O in cardiomyocytes fed a lipid mixture for 48 hrs and co-treated with vehicle or PDE9-I (replicated 4x), and summary for lipid droplets/myocyte on right (n=10/group, MW). **b)** Same protocol with myocytes loaded with 5  $\mu$ M BODIPY 493/503 labeling lipid droplets green and nuclei (DAPI) blue; (x3 replicates). **c)** Induction of lipolysis (glycerol released) in 3T3 L1 derived adipocytes incubated with IBMX (broad PDE inhibitor), isoproterenol (ISO), or PDE9-I. (n=10,8,8,12 respectively; Welch ANOVA, DMCT). **d)** Lipolysis with PDE9-I +/- ANP stimulation in HepG2 (left) and myocytes (right). PDE9-I (+ 2.5  $\mu$ M, ++ 5  $\mu$ M) stimulated lipolysis in the presence of ANP, and this was suppressed by concomitant PPAR $\alpha$  inhibition. # p=0.0006; \* p=0.0012, KW unpaired-test with Bonferoni correction for 4 comparisons. **e)** PDE9-I augmentation of ANP stimulated lipolysis is prevented in HepG2 cells expressing siRNA-*PDE9* vs siRNA-*scrambled*. (n=6/group; 2WANOVA with Tukey comparisons test). **f)** EM images of LV myocardium from OVX ob/CMS mice treated with placebo or PDE9-I. Disruption of normal structure with separation of cristae and reduced density (arrow-A) and lipid accumulation (arrow-B) are shown with placebo, but much less evident with drug treatment.

show PDE9-I stimulates lipolysis particularly with NP background stimulation, reducing mitochondrial lipid accumulation and morphological disruption.

### ***PDE9 localizes to mitochondria and stimulates fat oxidation***

We previously reported PDE9 co-localizes with the sarcoplasmic reticular (SR) ATPase at T-tubules in cardiac myocytes in contrast to PDE5A which localizes to the Z-disk(24). The proximity of T-tubular membranes and mitochondria in the dyadic cleft raises the possibility that PDE9 also localizes with the latter. To test this, *PDE9-Flag* was expressed in cardiomyocytes and cells fractionated into mitochondrial and cytosolic components. We used Flag-Ab as native PDE9 antibody detection is poor with existing reagents. PDE9-FLAG was enriched in the mitochondrial fraction (Figure 5a) even after normalization for total protein. By contrast, *Pde5a-Flag* was primarily found in the cytosol (Figure S6a). Secondly, mitochondria were stained with Mitotraker Red which colocalized with a *PDE9-Gfp* imaged with confocal fluorescence microscopy (Figure 5b). Lastly, immuno-gold electron microscopy of cardiomyocytes expressing GFP-PDE9 or GFP revealed a diffuse cytosolic distribution for GFP but primarily mitochondrial localization for PDE9-GFP (Figure 5c). Together these results show PDE9 can specifically localize at mitochondria.

To test the impact of PDE9 loss-of-function on mitochondrial FA oxidation, cardiomyocytes were pre-treated with PDE9-I or vehicle and then incubated with palmitate the primary fuel. Basal and maximal oxygen consumption and ATP production

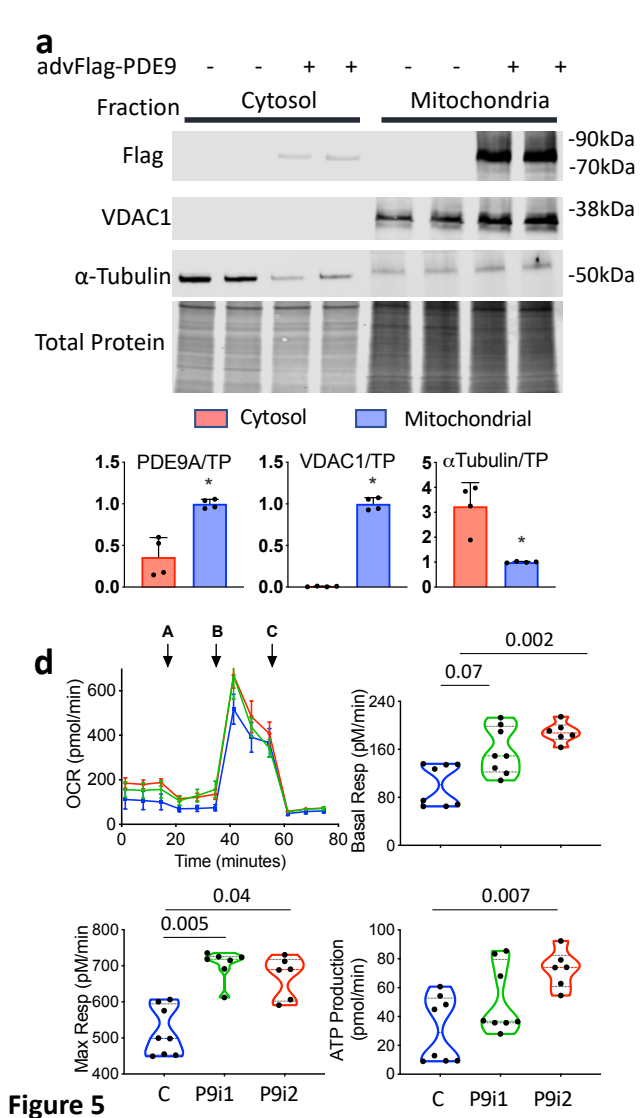

**Figure 5**

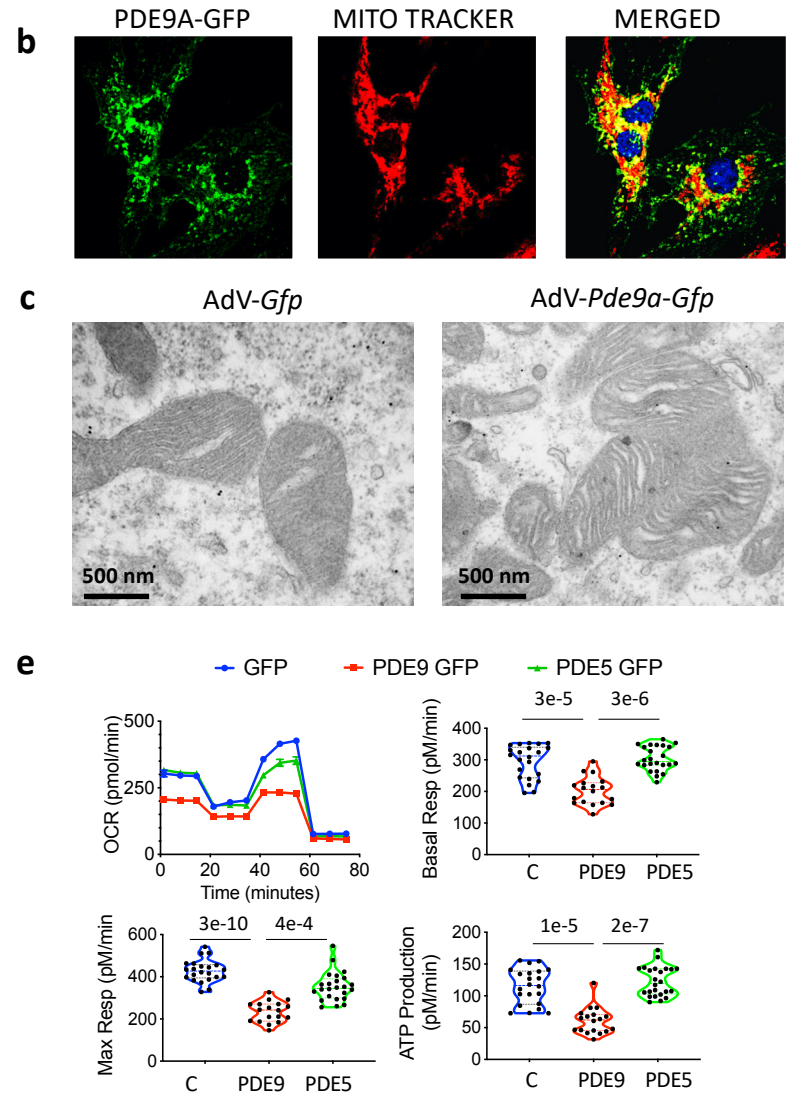

**Figure 5. PDE9 localizes to mitochondria and its inhibition augments fat oxidation**

**a)** Cardiac myocytes expressing PDE9-FLAG show higher levels in mitochondrial versus cytosolic fraction. Summary results n=4, \*-p=0.028 by MW. **b)** Co-localization of PDE9-GFP with Mitotracker-Red by confocal fluorescence imaging (repeated x3). **c)** Example - gold labeled PDE9-GFP and GFP imaged by EM. Dark black dots identify the proteins. GFP is diffusely distributed whereas PDE9-GFP is primarily found in mitochondria. (repeated x12/group). Lower magnification images shown in Figure S6b. **d)** Oxygen consumption rate (OCR) in myocytes pretreated with vehicle (Veh, n=8) or PDE9-I (P9i-1 2.5 $\mu$ M (n=8), 5 $\mu$ M (n=6) x 24 hrs and then fed fatty acids as primary substrate x 24 hrs. A:oligomycin; B:FCCP; C:rotenone + antimycin (n=8,6; KW, DMCT p values displayed) **e)** OCR in myocytes pre-infected with AdV expressing *PDE9-Gfp*, *Pde5a-Gfp*, or *Gfp* alone for 48 hrs. (n=18,24, 22 respectively; KW, DMCT p-values displayed).

were higher in PDE9-I treated cells (Figure 5d). Gain-of-function was assessed by pre-incubating myocytes with Adenovirus expressing either *Gfp-Pde9a* or *GFP-Pde5a*. PDE9 protein expression lowered basal and maximal respiration and ATP production, whereas these were unchanged with PDE5A overexpression (Figure 5e). Together, these data show PDE9 localizes to mitochondria, and that its expression inhibits respiration and ATP generation whereas its inhibition achieves the opposite.

### ***PPAR $\alpha$ signaling is downregulated in Human HFpEF***

Among the most prominent clinical syndromes combining morbid obesity and CMS is HFpEF, which now affects over half of all patients with heart failure(11). Our RNAseq analysis of differentially expressed genes in myocardium from human HFpEF versus controls found the transcriptome is potently influenced by BMI, and identified patient subgroups with distinct signaling pathway and clinical characteristics(35). Using this database, we now show mRNA abundance for *PPARA*, *PPARG*, and *PPARGC1A* is reduced by ~40% (adjusted q-score,  $p < 1e^{-6}$  for each, Figure 6a) in HFpEF versus controls. A volcano plot of genes associated with PPAR signaling (based on KEGG) shows those coupled to fatty acid uptake (*FABP5*, *FABP4*, *CD36*), degradation (*LPL*), and oxidation (*CPT1a*, *ACOX1/3*, *ACAA1*, *ACSL3/4*) are significantly reduced in HFpEF (Figure 6b). Unsupervised hierarchical cluster analysis using *PPARA* and *PDE9A* expression only identified two patient groups (Figure 6c), both similarly obese (Table S1). *PDE9A* was similarly and directly correlated with *PPARA* abundance in each group,

but Group 1 had significantly lower *PPARA* expression for any given *PDE9A* level ( $P=7e^{-8}$  for offset by ANCOVA). Group 1 had fewer patients with diabetes, their left ventricles were smaller with less hypertrophy, and plasma natriuretic peptide levels lower as compared to Group 2. Interestingly, Group 1 overlaps with a HFpEF subgroup we had previously identified using agnostic non-negative matrix factorization and the broad transcriptome (35), that contained mostly females with smaller hearts and pro-inflammatory signaling (Table S1). Group 2 overlaps with a second sub-group whose hearts display expression profiles closest to that for HF with low EF (35). These results support the relevance of *PPARA* downregulation in HFpEF and reveal a subgroup that may be particularly responsive to enhancement by PDE9-I.

### **PPAR $\alpha$ activation is required for PDE9-I to reduce obesity and CMS**

Prior studies have shown activation of PPAR $\alpha$  in models of DIO reduces fatty liver and can prevent development of obesity(36, 37), while the PPAR $\alpha$  KO mouse develops obesity gradually over many months(38). To test if PPAR $\alpha$  activity is required to drive the anti-obesity efficacy from PDE9-I, OVX females with obesity-CMS were treated with either PDE9-I alone or combined with a selective PPAR $\alpha$  inhibitor (GW6471, daily i.p.). We chose this approach versus using a PPAR $\alpha$  KO as we could generate the identical obesity-CMS condition prior to interfering with PPAR $\alpha$  stimulation. GW6471 co-treatment reduced mRNA abundance of PPAR $\alpha$  regulated genes by about 50%, supporting on-target effects (Figure 7a). As before, mice receiving

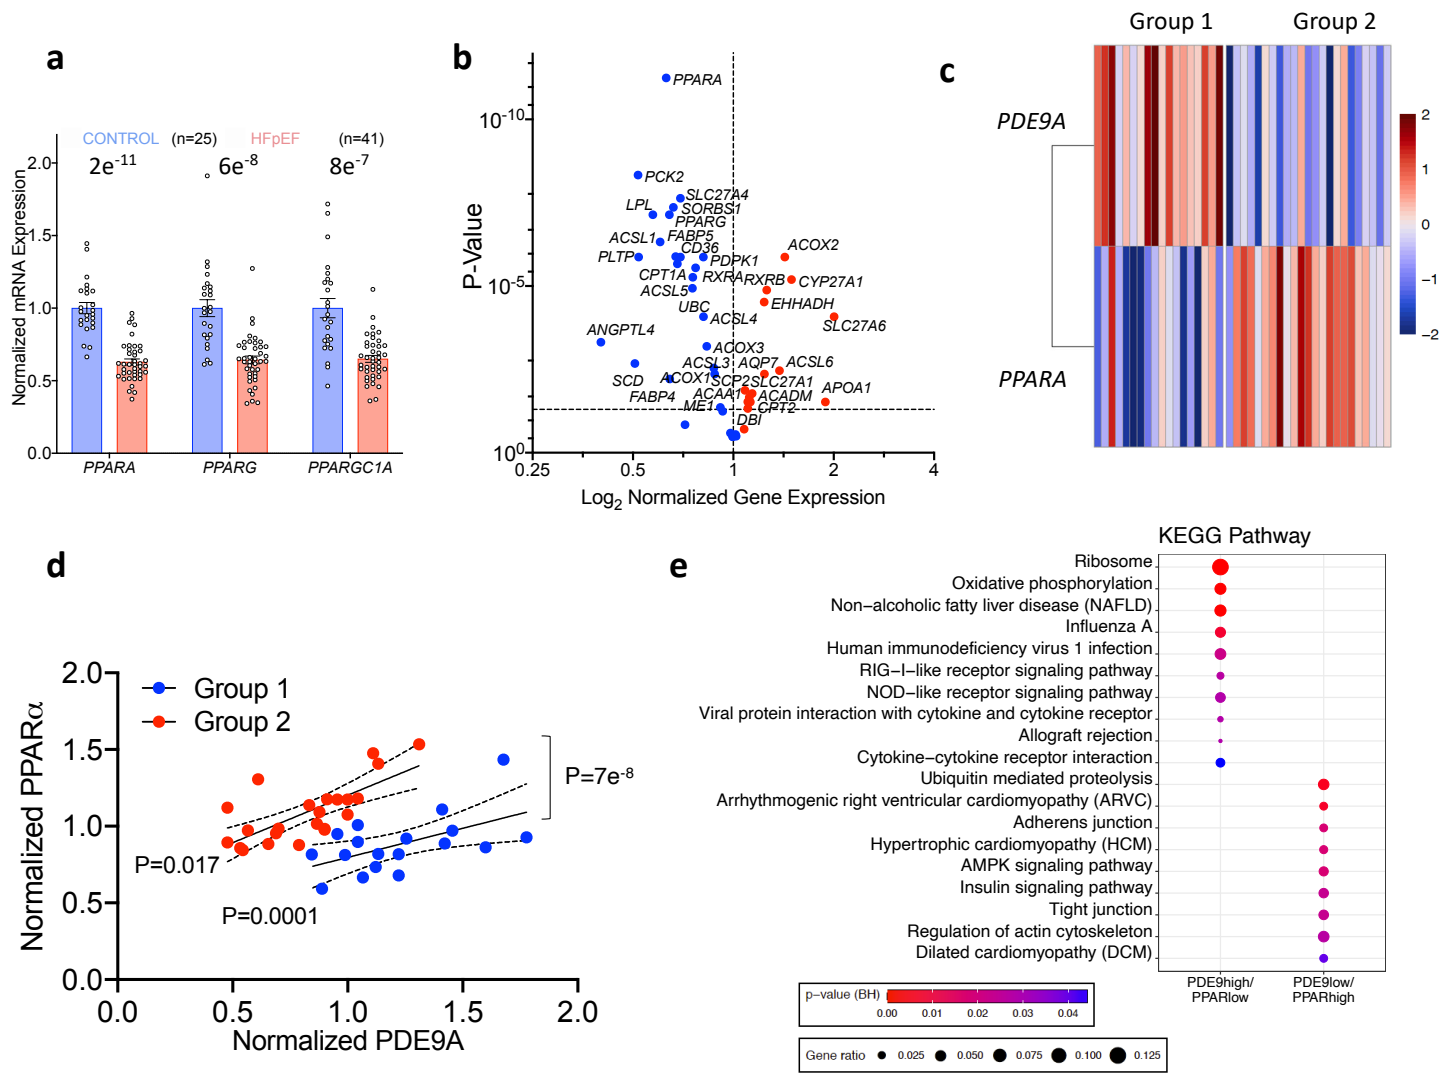

Figure 6



**Figure 6. *PPARA* and related gene expression is reduced in human HFpEF**

**myocardium directly relates to *PDE9A* expression, and defines subgroups. a)**

Expression of *PPARA*, *PPARg*, and *PPARGC1A* (*PGC1a*) in HFpEF (n=41) myocardium normalized to non-failing controls (n=24). (2S-BKY-MC-MW, q values shown). **b)**

Volcano plot of differential mRNA expression for genes in the KEGG-PPAR pathway. Benjamini-Hochberg MCT – q-values on y-axis. **c)** Unsupervised, hierarchical heat map

cluster analysis using *PPARA* and *PDE9* genes from the human HFpEF RNAseq data yielded two HFpEF groups with reciprocal relative expression of the two genes. **d)**

Regression *PDE9* versus *PPARA* expression for sub-groups identified by the cluster map.

Each group has a significant positive dependence with a similar slope but different offset (ANCOVA). **e)** KEGG pathway analysis from differentially expressed genes in the two

HFpEF subgroups defined by relative *PPARA* versus *PDE9* expression levels.

only PDE9-I had less total body and fat mass but no significant change in lean body mass and increased  $\text{VO}_2$  and  $\text{VCO}_2$  versus placebo, and co-inhibition of  $\text{PPAR}\alpha$  prevented these changes (Figure 7b). Total food intake and daily activity did not significantly differ between the groups (Figure S7a). Compared with placebo, reduced iWAT and gWAT mass (Figure 7c) and improved cardiac fractional shortening (Figure 7d) with PDE9-I were largely abrogated by concomitant  $\text{PPAR}\alpha$  blockade. Thus, the *in vivo* efficacy of PDE9-I on obesity-CMS required  $\text{PPAR}\alpha$  activation.

***PDE9-I is ineffective in non-OVX females with  $\text{ER}\alpha$  shifting  $\text{PPAR}\alpha$  DNA binding away from FAO regulating genes***

Endogenous estrogen has been found to suppress  $\text{PPAR}\alpha$ -stimulated gene expression and corresponding regulation of FA oxidation in tissue and *in vivo* obesity models(39). Consistent with this, the  $\text{PPAR}\alpha$  activator fenofibrate effectively reduced DIO in males and OVX females but non-OVX(37). These results combined with the current data showing that  $\text{PPAR}\alpha$  inhibition prevents PDE9-I from reducing obesity, led us to hypothesize a similar sex dimorphism may apply to effects from PDE9-I. This was tested in a cohort of non-OVX female mice subjected to the identical HFD-mTAC protocol. As shown in Figure 8, PDE9-I had negligible impact on total body, fat, or lean mass (Figure 8a), BAT adipocyte size or browning (Figure 8b), serum lipids (Figure S7b), iWAT or gWAT mass (Figure S7c), food intake, activity, and whole-body respiration (Figure S7d), or hepatic steatosis (Figure S7e) in non-OVX females.

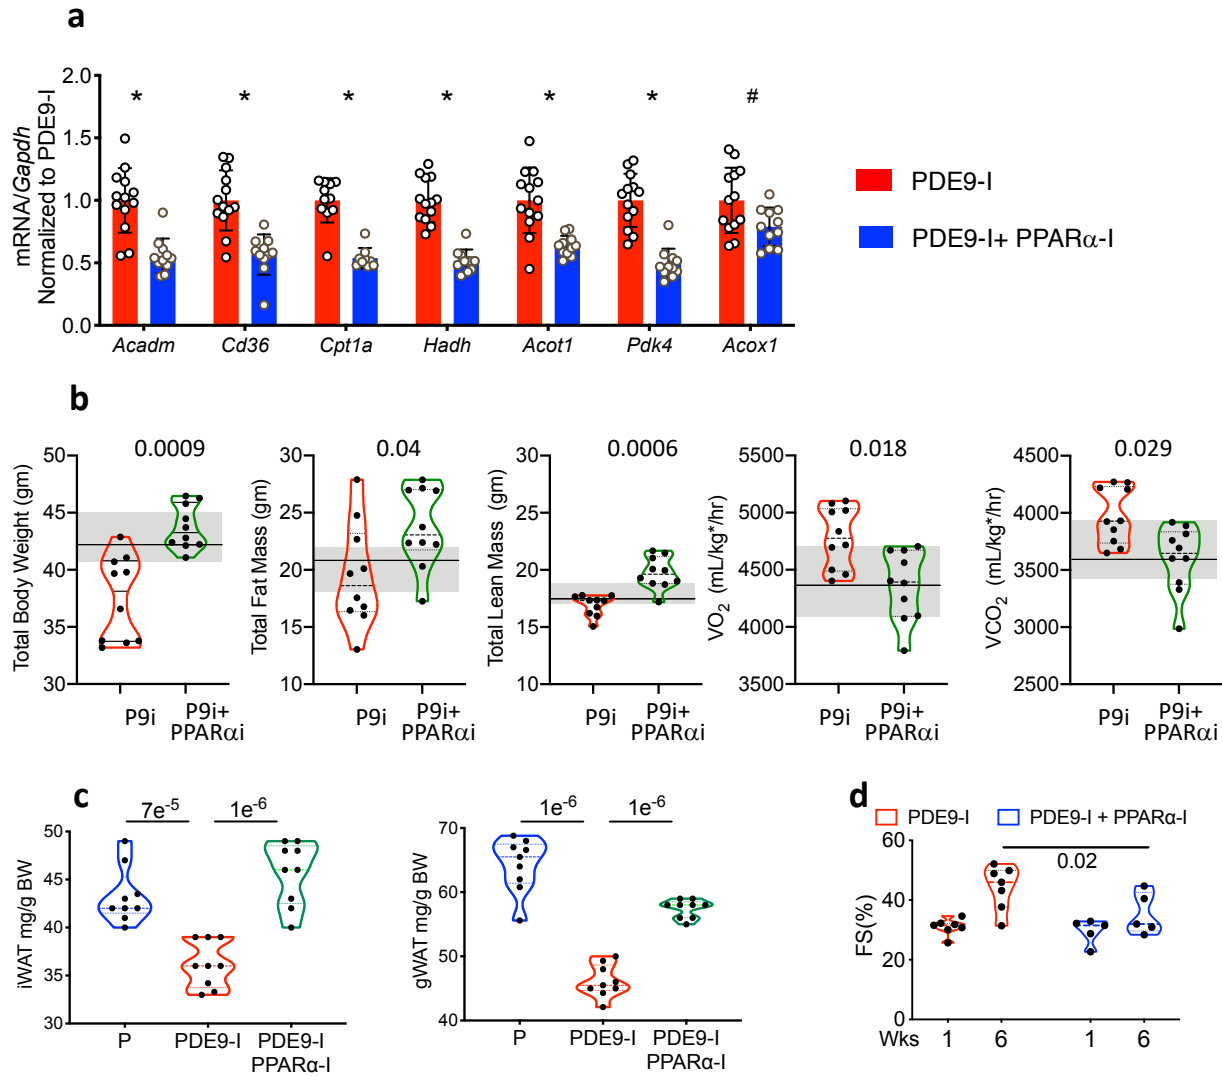

**Figure 7**

**Figure 7. Inhibition of PPAR $\alpha$  blocks beneficial effects of PDE9-I in OVX model. a)**

Quantitative PCR of PPAR $\alpha$ -associated genes in myocardial tissue from OVX ob/CMS mice treated with PDE9-I  $\pm$  PPAR $\alpha$ -inhibition. 2S-BKY-MC-MW, q values \* -  $p \leq 5e^{-5}$ ; #  $p=0.007$ . **b)** Effect of PPAR $\alpha$  co-inhibition on PDE9-I induced reduction of total body, fat, and lean mass, and increases in VO<sub>2</sub> and CO<sub>2</sub> in OVX ob/CMS mice. Results for placebo treated OVX mice (derived from data in Figure 1) are plot with median (dark line) and 75%-25% confidence intervals (shaded). The addition of a PPAR $\alpha$ -I significantly reversed PDE9-I mediated responses in these parameters, returning their values to those with placebo for all by lean mass that rose by 5%. (n=10/group, p-values displayed from KW (includes all 3 groups) and DMCT) **c)** iWAT and gWAT weight in OVX mice PDE9-I  $\pm$  PPAR $\alpha$ -I versus placebo; n=9/group, ANOVA, p-values from TMCT). **d)** Fractional shortening (%FS) from same experiment; (n=7,5, 2WANOVA, p-value from Sidak's comparisons test).

Failure of PDE9-I to alter obesity-CMS in non-OVX females was not due to a lack of increased *Ppara* mRNA abundance which rose similarly as in OVX females and males (Figure 8c, compare to Figure 2f). However, mRNA levels for genes controlling FA metabolism and mitochondrial oxidation/uncoupling downstream of PPAR $\alpha$  were very little or not significantly changed (Figure 8d). Acyl-carnitine analysis of BAT also found no changes despite PDE9-I (Figure 8e).

These results indicate that sex hormones in intact females impeded the capacity of PDE9-I to increase PPAR $\alpha$ -regulated FA catabolism. Since *Ppara* expression increased yet mRNA abundance for its regulated genes did not, we speculated that coincident estrogen receptor (ER) signaling alters PPAR $\alpha$  DNA binding to impact the latter's transcriptional function. To test this, ChIP-seq for PPAR $\alpha$  binding was performed using Hep G2 cells transfected with either PPAR $\alpha$  (+PPAR $\alpha$  agonist) alone, or in combination with either ER $\alpha$  or ER $\beta$  transfection and respective agonists. We found ~17,500 PPAR $\alpha$  DNA binding sites when stimulated alone, but this number fell by nearly half and engaged mostly different sites if ER $\alpha$  was co-activated (Figure 8f). With ER $\beta$  co-activation, ~1/3 of binding sites with PPAR $\alpha$  alone were maintained, and 1/3 were altered; and there was also an overall reduction. Gene lists based on PPAR $\alpha$  chromatin binding for the three conditions were subjected to KEGG pathway enrichment analysis,

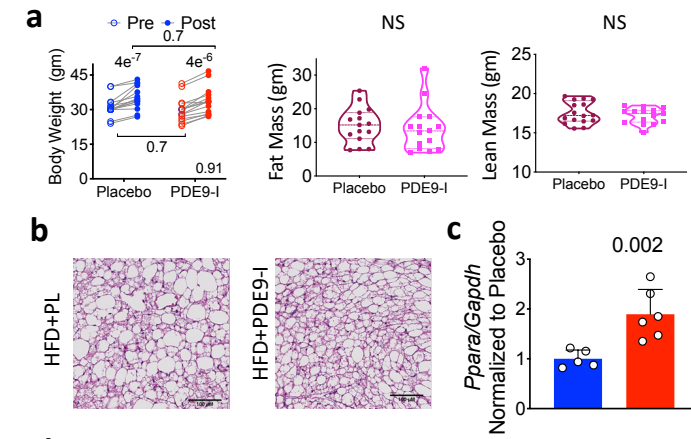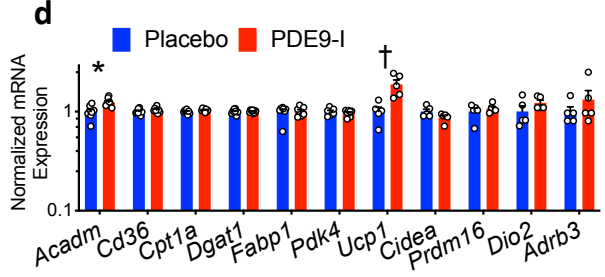

Figure 8

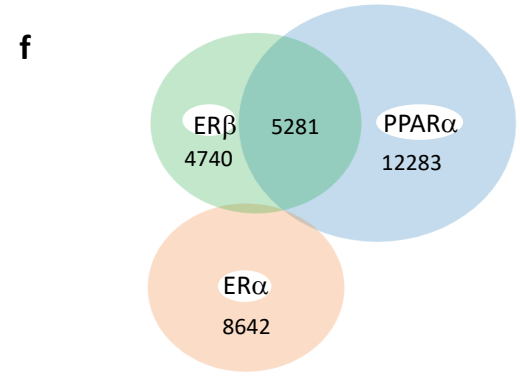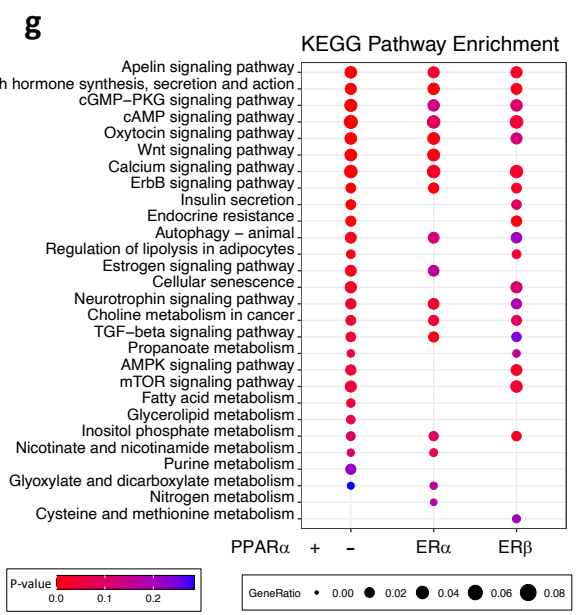

**Figure 8. PDE9-I does not impact body weight, fat, or PPAR $\alpha$  downstream signaling, associated with estrogen suppression of PPAR $\alpha$  DNA binding to fat metabolism genes.** **a)** Total body weight, fat, and lean mass are not significantly altered in non-OVX ob/CMS female mice treated with placebo versus PDE9-I. **b)** BAT histology shows enlarged adipocytes and reduced mitochondria density in the placebo group, that is not changed with PDE9-I (repeated x3) **c)** *PPAR $\alpha$*  mRNA expression increases in non-OVX at levels similar to those for male and OVX mice. (MW). **d)** qPCR results for fatty acid metabolism and mitochondrial respiration genes in BAT from non-OVX model. (log-transformed, 2S-BKY-MC-MW, \*  $q=0.03$ , †  $q=0.04$ , all others  $>0.5$ ). **e)** Metabolomics of acylcarnitines in BAT from normal controls and ob/CMS non-OVX with placebo vs PDE9-I. (n=5/group, 2S-BKY-MC-MW; for placebo vs PDE9-I all  $q$ -values  $>0.5$ ; for control chow (non-obese) versus placebo, all but one  $p \leq 0.001$ ; (C22,  $p=0.006$ ). **f)** Venn diagram of ChIP-seq identified PPAR $\alpha$  binding sites in HepG2 cells with PPAR $\alpha$  stimulation alone or combined with ER $\alpha$  or ER $\beta$  co-stimulation. **g)** KEGG pathway analysis from ChIP-seq identified genes with PPAR $\alpha$  binding shows loss of fat metabolism related pathways by co-activation with ER $\alpha$  or ER $\beta$ .

showing ER $\alpha$  co-activation particularly reduces PPAR $\alpha$  binding to genes involved with FA metabolism (Figure 8g). This is consistent with the mRNA analysis (Figure 8c, d) and the lack obesity-CMS effects by PDE9-I in non-OVX mice.

## Discussion

This study supports the utility of a new treatment for severe obesity and associated cardiometabolic syndrome based on PDE9 inhibition. We show PDE9 localizes to mitochondria, that its suppression increases fat-metabolism and lipolysis, and reduces fat deposits in the abdomen, liver, and myocardium. Concomitant reduction of myocardial lipids particularly long-chain acylcarnitines is important as their accumulation is associated with cardiac and lipotoxicity with mitochondrial dysfunction (34). The ability of PDE9-I to reduce fat accumulation in the liver and abdomen is also significant, as both depots are linked to worse CMS morbidity(40). Cardiac pathobiology common with CMS, such as LV hypertrophy and pathological pro-fibrotic signaling were also ameliorated by PDE9-I. The link between PDE9-I and *Ppar $\alpha$*  upregulation involves promoter activation to increase expression of its many regulated genes controlling fat metabolism, mitochondrial respiration and biogenesis. The metabolic effects from PDE9-I are absent in non-OVX females despite increased PPAR $\alpha$  mRNA, as the downstream gene activation does not occur. This is compatible with a shift of PPAR $\alpha$  chromatin



binding away from genes controlling fat-metabolism by the co-activation of ER $\alpha$ .

Importantly, we also find depressed myocardial *PPARA* expression and associated signaling in obese humans with HFpEF. Given that PDE9 inhibitors appear safe and well tolerated in humans based on prior testing for other disorders, the current findings support their clinical assessment in men and postmenopausal women with obesity-CMS.

Studies first reporting lipolytic and anti-obesity effects from PKG stimulation identified several mechanisms, including phosphorylation and activation of hormone sensitive lipase, p38-MAP kinase (by unknown intermediate)(41) similar to the pathway used by PKA(42) and AMP activated kinase(43). These are felt to converge on transcriptional regulators PPAR gamma co-activator 1 $\alpha$  (PGC1 $\alpha$ ) and PPAR $\alpha$ (14, 15) to control metabolism. PKG-dependent PPAR $\alpha$  activation has been previously linked to mitochondrial protection against hypoxia-induced cardiac injury(19) and increased FA oxidation and catabolism in skeletal muscle(16), though not with countering obesity. To our knowledge, none of these kinase or lipase effectors of PKG modulation have been shown to confer a sexual dimorphism on metabolic signaling. However, a sexual dimorphism has been reported for the impact of PPAR $\alpha$  activation, as obese OVX females and males show lipolysis and reduced weight, whereas non-OVX do not (37, 44, 45). A similar disparity in PDE9-I responses coupled to differential downstream PPAR $\alpha$  signaling supports this factor as central to the metabolic and anti-obesity effects. Estrogen itself stimulates fat metabolism and mitochondrial oxidative respiration(8), and its

decline after menopause or OVX is associated with abdominal obesity, CMS, and reduced PPAR $\alpha$  and PGC1 $\alpha$  regulated signaling(7). ER and PPAR $\alpha$  have similar DNA binding motifs and protein partners such as RXR and coactivator PGC1 $\alpha$ (45), and prior studies have reported ER $\alpha$  protein interaction with PPAR $\alpha$  and inhibition of latter's expression and/or function in liver cancer(46) and in apolipoprotein regulation(47). To our knowledge, the present analysis is the first to directly test this interaction with ChIPSeq. The marked shift in PPAR $\alpha$  binding by ER $\alpha$  co-activation was striking. While many pathways remained engaged, those involved with fat metabolism declined. This suggests that pre-menopause, ER signaling may substitute for PPAR $\alpha$  regulation, whereas post-menopause, PPAR $\alpha$  becomes prominent so its activation by agonists or PDE9-I counters obesity. The mechanisms governing the chromatin interactions between PPAR $\alpha$  and ERs, and their testing in other cell types, remain to be explored.

While our results show cGMP-PKG activates PPAR $\alpha$  expression and gene regulation, other mechanisms may also exist. In this regard, our finding that PDE9 localizes to mitochondria whereas PDE5 is mostly in the cytosol, and that PDE9 but not PDE5 impacts mitochondrial respiration, suggests PDE9 may control this organelle by targeted post-translational changes as well. Co-localization of PDE9 to both SR membrane(24) and mitochondria puts it in a membrane domain within myocytes, consistent with its regulation of NP receptor-coupled cGMP. This differs from cytosolic regulation of cGMP by PDE5(48). The *PDE9* gene does not contain known

mitochondrial targeting sequences and its localization to this organelle may be part of a larger yet unknown protein complex. PKG also modifies proteins regulating cell growth, metabolism, and fibrosis, and these could potentially also play a role. For example, regulator of G-protein signaling 2 and 4(49), transient receptor potential canonical channel type 6(50), tuberous sclerosis complex protein 2(51) are all phosphorylated by PKG, suppressing Gq-protein coupled, NFAT/calcineurin, and mTORC1 signaling respectively. The latter can also shift metabolism to favor FA oxidation. These pleiotropic effects are attractive for treating a syndrome such as obesity-CMS and HFpEF given that renal, pulmonary, vascular, metabolic, and cardiac disease commonly co-exists(11).

The metabolic effects of PDE9-I documented here are compatible with its modulation of NP-derived cGMP(24, 28) and the demonstrated efficacy of NP to stimulate fat catabolism(14, 52-55) by enhancing FA oxidation. From a therapeutic perspective, however, PDE9-I offers some advantages over exogenous NP. First it is a small molecule as opposed to a peptide. Second, obesity blunts NP signaling in animals and humans by increasing expression of the NP-clearance receptor (NPRC, NPR3) in adipose tissue (56) while reducing that of primary NP signaling receptors(57). However, PDE9 inhibition can still augment cGMP as long as there is some upstream stimulation. Consistent with this, prior studies required gene deletion of NPRC to achieve weight reduction from exogenous NP(41), but this was not needed for PDE9-I. Lastly, PDE9-I augments cGMP only in those cells in which it is expressed, whereas NP and other cGMP

stimulation methods activate the pathway broadly. To date, its inhibition has induced little to no change in systemic artery pressure in preclinical(25, 26) and clinical trials(30).

There are other approaches being studied for countering obesity, all already in clinical use, mostly for diabetes. PPAR $\alpha$  agonists such as fenofibrate and pemafibrate reduce body weight and notably triglycerides in DIO in mice(58). Human studies have not shown weight loss, and their primary indication remains reducing high triglyceride levels. Fibrates activate PPAR $\alpha$  protein so their impact depends on differential tissue expression. This is normally greatest in the liver, likely underlying their primary impact on triglycerides. As we show here, PDE9-I works differently by activating PPAR $\alpha$  mRNA abundance in multiple tissues. This may explain the marked impact on reducing fat depots versus changes reported with PPAR $\alpha$ -agonists in similar DIO models(36). Several anti-diabetic therapies are currently being tested for weight loss. Glucagon-like peptide-1 increases insulin secretion, enhancing glucose uptake and storage as glycogen. Its anti-obesity effects are thought to be primarily due to appetite suppression with increased satiety(59). Sodium-glucose co-transporter-2 (SGLT2) antagonists treat diabetes and also improve morbidity and mortality from heart failure(60). They too are being studied for weight loss indications (61), and though the mechanism remains uncertain, enhanced glucose/sodium excretion may play a role. Lastly, in late 2020, an FDA advisory committee overwhelmingly supported use of the combination of sacubitril and valsartan (neprilysin inhibitor and AT-1 receptor blocker) to treat HFpEF. If

approved by the FDA, this would become the first approved therapeutic for HFpEF based on clinical-trial evidence (62). A major mechanism of its benefit over that of AT-1 blockade is attributed to suppression of NP proteolysis by neprilysin(63). Yet studies have not reported changes in PPAR $\alpha$  signaling nor reduction in body weight(64) or fat transcriptomes(65). This could be a matter of dose limitations to avoid blood pressure decline, and/or enhancing the signaling in the right tissues – something PDE9-I might provide in a synergistic manner.

Our study has several limitations. We used PDE9 pharmacological inhibition rather than gene deletion to test its role, as we wanted to generate substantial obesity and CMS before applying the intervention. Results using a global *PDE9* KO mouse subjected to DIO are being presented in a separate study and also reveal less weight gain and metabolic improvement over time(66). While our model of obesity-CMS provides insights into HFpEF, it is not a model of HFpEF as the pressure-load was mild and mice did not develop heart failure. It is a reasonable model of obesity-CMS, incorporating the two-hit approach of DIO plus cardiac pressure-load sufficient to induce pathological hypertrophy. Notably, the severity of obesity generated in females and similar weight gain in OVX and males is lacking in most prior studies. We did not show direct evidence for PDE9-I increased PKG activity as this remains hard to detect despite cGMP increase from this regulatory pathway, likely due to a membrane-localized nano-compartment in which the signaling transpires that is lost with cell/tissue lysis. Still, the molecular

signatures in the myocardium are very consistent with PKG activation. Lastly, the ChipSeq analysis is preliminary in that how the two transcriptional regulators interact remains unknown, as does whether this occurs similarly in adipocytes and other cells. However, we could find no prior similar analysis, and our results do show a striking interaction consistent with the sexual dimorphism of *Ppara* gene regulation we observed.

When first discovered, PDE9 expression was most readily detected in the brain, and based on this, all of the early pharmacological development of selective inhibitors was targeted to neurocognitive diseases such as schizophrenia and Alzheimer's. While effective human translation remains elusive for these indications, preclinical data in the heart as since spawned clinical trials testing the impact on heart failure. This work continues, but the safety and tolerability of multiple PDE9 inhibitors has been confirmed and has negligible impact on arterial blood pressure or heart rate. Given this, the present results suggest translation to humans with obesity and CMS is feasible, and worth pursuing.

## **Materials and Methods**

Detailed material and methods are provided in Supplemental Materials. All statistical tests used for each data set are identified in each figure legend, along with the number of biological replicates for each group. Non-parametric models were used if a group within the experiment contained 6 or less replicates, or the distribution was not normally distributed. P-values for statistical testing are shown in individual panels or legends and explained for each.

## **Supplemental Materials**

### **Materials and Methods**

**Figure S1. Model of severe obesity and cardiac pressure-load (CMS) in female C57BL6/N mice.**

**Figure S2. Hepatic steatosis in OVX and male mice with ob/CMS model.**

**Figure S3. PDE9-I reduces obesity and improves metabolic profile in ob/CMS male mice.**

**Figure S4. PDE9-I increases myocardial cGMP, and improves male ob/CMS mouse cardiac function, pathological hypertrophic/fibrotic molecular signature, and fat metabolome.**

**Figure S5. Impact of PDE9-I on mitochondrial volume density and lipid accumulation.**

**Figure S6. PDE5A localizes to cytosol, whereas PDE9 localizes to mitochondria.**

**Figure S7. PDE9-I +/- PPARa-I does not alter food intake or activity. Non-OVX females display no significant changes in serum lipids, iWAT or gWAT weight, food intake, activity, or whole-body metabolism, or hepatic lipid accumulation in response to PDE9-I.**

**Supplemental Data Table. Clinical Features of two HpPEF groups defined by relative ratio of *PPARA* and *PDE9* gene expression.**



## REFERENCES

1. C. Koliaki, S. Liatis, A. Kokkinos, Obesity and cardiovascular disease: revisiting an old relationship. *Metabolism* **92**, 98-107 (2019).
2. M. Blüher, Obesity: global epidemiology and pathogenesis. *Nature reviews. Endocrinology* **15**, 288-298 (2019).
3. M. E. Piché, A. Tchernof, J. P. Després, Obesity Phenotypes, Diabetes, and Cardiovascular Diseases. *Circ Res* **126**, 1477-1500 (2020).
4. C. R. Kahn, G. Wang, K. Y. Lee, Altered adipose tissue and adipocyte function in the pathogenesis of metabolic syndrome. *J Clin Invest* **129**, 3990-4000 (2019).
5. V. N. Rao, M. Fudim, R. J. Mentz, E. D. Michos, G. M. Felker, Regional adiposity and heart failure with preserved ejection fraction. *Eur J Heart Fail* **22**, 1540-1550 (2020).
6. T. Becher, S. Palanisamy, D. J. Kramer, M. Eljalby, S. J. Marx, A. G. Wibmer, S. D. Butler, C. S. Jiang, R. Vaughan, H. Schöder, A. Mark, P. Cohen, Brown adipose tissue is associated with cardiometabolic health. *Nat Med* **27**, 58-65 (2021).
7. E. Morselli, R. S. Santos, A. Criollo, M. D. Nelson, B. F. Palmer, D. J. Clegg, The effects of oestrogens and their receptors on cardiometabolic health. *Nature reviews. Endocrinology* **13**, 352-364 (2017).
8. Z. Zhou, T. M. Moore, B. G. Drew, V. Ribas, J. Wanagat, M. Civelek, M. Segawa, D. M. Wolf, F. Norheim, M. M. Seldin, A. R. Strumwasser, K. A. Whitney, E. Lester, B. R. Reddish, L. Vergnes, K. Reue, P. Rajbhandari, P. Tontonoz, J. Lee, S. K. Mahata, S. C. Hewitt, O. Shirihai, C. Gastonbury, K. S. Small, M. Laakso, J. Jensen, S. Lee, C. A. Drevon, K. S. Korach, A. J. Lusis, A. L. Hevener, Estrogen receptor  $\alpha$  controls metabolism in white and brown adipocytes by regulating Polg1 and mitochondrial remodeling. *Science translational medicine* **12**, (2020).

9. M. Obokata, Y. N. V. Reddy, S. V. Pislaru, V. Melenovsky, B. A. Borlaug, Evidence Supporting the Existence of a Distinct Obese Phenotype of Heart Failure With Preserved Ejection Fraction. *Circulation* **136**, 6-19 (2017).
10. D. W. Kitzman, B. J. Nicklas, Pivotal Role of Excess Intra-Abdominal Adipose in the Pathogenesis of Metabolic/Obese HFpEF. *JACC Heart Fail* **6**, 1008-1010 (2018).
11. S. Mishra, D. A. Kass, Cellular and molecular pathobiology of heart failure with preserved ejection fraction. *Nature reviews. Cardiology*, (2021).
12. D. W. Kitzman, C. S. P. Lam, Obese Heart Failure With Preserved Ejection Fraction Phenotype: From Pariah to Central Player. *Circulation* **136**, 20-23 (2017).
13. D. A. Kass, COVID-19 and Severe Obesity: A Big Problem? *Ann Intern Med*, (2020).
14. S. Collins, A heart-adipose tissue connection in the regulation of energy metabolism. *Nature reviews. Endocrinology* **10**, 157-163 (2014).
15. S. Vinnakota, H. H. Chen, The Importance of Natriuretic Peptides in Cardiometabolic Diseases. *J Endocr Soc* **4**, bvaa052 (2020).
16. T. Ashmore, L. D. Roberts, A. J. Morash, A. O. Kotwica, J. Finnerty, J. A. West, S. A. Murfitt, B. O. Fernandez, C. Branco, A. S. Cowburn, K. Clarke, R. S. Johnson, M. Feelisch, J. L. Griffin, A. J. Murray, Nitrate enhances skeletal muscle fatty acid oxidation via a nitric oxide-cGMP-PPAR-mediated mechanism. *BMC Biol* **13**, 110 (2015).
17. K. Kokkonen, D. A. Kass, Nanodomain Regulation of Cardiac Cyclic Nucleotide Signaling by Phosphodiesterases. *Annual review of pharmacology and toxicology* **57**, 455-479 (2017).
18. V. Cannone, A. Cabassi, R. Volpi, J. C. Burnett, Atrial Natriuretic Peptide: A Molecular Target of Novel Therapeutic Approaches to Cardio-Metabolic Disease. *International journal of molecular sciences* **20**, (2019).

19. J. A. Horscroft, K. A. O'Brien, A. D. Clark, R. T. Lindsay, A. S. Steel, N. E. K. Procter, J. Devaux, M. Frenneaux, S. D. R. Harridge, A. J. Murray, Inorganic nitrate, hypoxia, and the regulation of cardiac mitochondrial respiration-probing the role of PPAR $\alpha$ . *Faseb j* **33**, 7563-7577 (2019).
20. L. S. Hoffmann, J. Etzrodt, L. Willkomm, A. Sanyal, L. Scheja, A. W. Fischer, J. P. Stasch, W. Bloch, A. Friebe, J. Heeren, A. Pfeifer, Stimulation of soluble guanylyl cyclase protects against obesity by recruiting brown adipose tissue. *Nature communications* **6**, 7235 (2015).
21. E. Takimoto, H. C. Champion, M. Li, D. Belardi, S. Ren, E. R. Rodriguez, D. Bedja, K. L. Gabrielson, Y. Wang, D. A. Kass, Chronic inhibition of cyclic GMP phosphodiesterase 5A prevents and reverses cardiac hypertrophy. *Nat.Med.* **11**, 214-222 (2005).
22. G. Colombo, M. D. Colombo, L. Schiavon Lde, A. J. d'Acampora, Phosphodiesterase 5 as target for adipose tissue disorders. *Nitric oxide : biology and chemistry / official journal of the Nitric Oxide Society* **35**, 186-192 (2013).
23. H. Sasaki, T. Nagayama, R. M. Blanton, K. Seo, M. Zhang, G. Zhu, D. I. Lee, D. Bedja, S. Hsu, O. Tsukamoto, S. Takashima, M. Kitakaze, M. E. Mendelsohn, R. H. Karas, D. A. Kass, E. Takimoto, PDE5 inhibitor efficacy is estrogen dependent in female heart disease. *J Clin Invest* **124**, 2464-2471 (2014).
24. D. I. Lee, G. Zhu, T. Sasaki, G. S. Cho, N. Hamdani, R. Holewinski, S. H. Jo, T. Danner, M. Zhang, P. P. Rainer, D. Bedja, J. A. Kirk, M. J. Ranek, W. R. Dostmann, C. Kwon, K. B. Margulies, J. E. Van Eyk, W. J. Paulus, E. Takimoto, D. A. Kass, Phosphodiesterase 9A controls nitric-oxide-independent cGMP and hypertrophic heart disease. *Nature* **519**, 472-476 (2015).
25. D. A. Richards, M. J. Aronovitz, P. Liu, G. L. Martin, K. Tam, S. Pande, R. H. Karas, D. M. Bloomfield, M. E. Mendelsohn, R. M. Blanton, CRD-733, a Novel PDE9 (Phosphodiesterase 9) Inhibitor, Reverses Pressure Overload-Induced Heart Failure. *Circ Heart Fail* **14**, e007300 (2021).

26. N. J. A. Scott, M. T. Rademaker, C. J. Charles, E. A. Espiner, A. M. Richards, Hemodynamic, Hormonal, and Renal Actions of Phosphodiesterase-9 Inhibition in Experimental Heart Failure. *J Am Coll Cardiol* **74**, 889-901 (2019).
27. M. Methawasin, J. Strom, T. Borkowski, Z. Hourani, R. Runyan, J. E. Smith, 3rd, H. Granzier, Phosphodiesterase 9a Inhibition in Mouse Models of Diastolic Dysfunction. *Circ Heart Fail* **13**, e006609 (2020).
28. J. F. Harms, F. S. Menniti, C. J. Schmidt, Phosphodiesterase 9A in Brain Regulates cGMP Signaling Independent of Nitric-Oxide. *Front Neurosci* **13**, 837 (2019).
29. B. Omar, E. Banke, M. Ekelund, S. Frederiksen, E. Degerman, Alterations in cyclic nucleotide phosphodiesterase activities in omental and subcutaneous adipose tissues in human obesity. *Nutrition & diabetes* **1**, e13 (2011).
30. E. M. Schwam, T. Nicholas, R. Chew, C. B. Billing, W. Davidson, D. Ambrose, L. D. Altstiel, A multicenter, double-blind, placebo-controlled trial of the PDE9A inhibitor, PF-04447943, in Alzheimer's disease. *Current Alzheimer research* **11**, 413-421 (2014).
31. P. C. Even, N. A. Nadkarni, Indirect calorimetry in laboratory mice and rats: principles, practical considerations, interpretation and perspectives. *American journal of physiology. Regulatory, integrative and comparative physiology* **303**, R459-476 (2012).
32. N. Fukuma, E. Takimoto, K. Ueda, P. Liu, M. Tajima, Y. Otsu, T. Kariya, M. Harada, H. Toko, K. Koga, R. M. Blanton, Jr., R. H. Karas, I. Komuro, Estrogen Receptor- $\alpha$  Non-Nuclear Signaling Confers Cardioprotection and Is Essential to cGMP-PDE5 Inhibition Efficacy. *JACC. Basic to translational science* **5**, 282-295 (2020).
33. D. Shao, S. C. Kolwicz, Jr., P. Wang, N. D. Roe, O. Villet, K. Nishi, Y. A. Hsu, G. V. Flint, A. Caudal, W. Wang, M. Regnier, R. Tian, Increasing Fatty Acid

- Oxidation Prevents High-Fat Diet-Induced Cardiomyopathy Through Regulating Parkin-Mediated Mitophagy. *Circulation* **142**, 983-997 (2020).
34. K. Tsushima, H. Bugger, A. R. Wende, J. Soto, G. A. Jenson, A. R. Tor, R. McGlaufflin, H. C. Kenny, Y. Zhang, R. Souvenir, X. X. Hu, C. L. Sloan, R. O. Pereira, V. A. Lira, K. W. Spitzer, T. L. Sharp, K. I. Shoghi, G. C. Sparagna, E. A. Rog-Zielinska, P. Kohl, O. Khalimonchuk, J. E. Schaffer, E. D. Abel, Mitochondrial Reactive Oxygen Species in Lipotoxic Hearts Induce Post-Translational Modifications of AKAP121, DRP1, and OPA1 That Promote Mitochondrial Fission. *Circ Res* **122**, 58-73 (2018).
35. V. S. Hahn, H. Knutsdottir, X. Luo, K. Bedi, K. B. Margulies, S. M. Haldar, M. Stolina, J. Yin, A. Y. Khakoo, J. Vaishnav, J. S. Bader, D. A. Kass, K. Sharma, Myocardial Gene Expression Signatures in Human Heart Failure With Preserved Ejection Fraction. *Circulation* **143**, 120-134 (2021).
36. M. Araki, Y. Nakagawa, A. Oishi, S. I. Han, Y. Wang, K. Kumagai, H. Ohno, Y. Mizunoe, H. Iwasaki, M. Sekiya, T. Matsuzaka, H. Shimano, The Peroxisome Proliferator-Activated Receptor  $\alpha$  (PPAR $\alpha$ ) Agonist Pemafibrate Protects against Diet-Induced Obesity in Mice. *International journal of molecular sciences* **19**, (2018).
37. M. Yoon, S. Jeong, C. J. Nicol, H. Lee, M. Han, J. J. Kim, Y. J. Seo, C. Ryu, G. T. Oh, Fenofibrate regulates obesity and lipid metabolism with sexual dimorphism. *Exp Mol Med* **34**, 481-488 (2002).
38. P. Costet, C. Legendre, J. Moré, A. Edgar, P. Galtier, T. Pineau, Peroxisome proliferator-activated receptor alpha-isoform deficiency leads to progressive dyslipidemia with sexually dimorphic obesity and steatosis. *J Biol Chem* **273**, 29577-29585 (1998).
39. S. Jeong, M. Yoon, Inhibition of the actions of peroxisome proliferator-activated receptor alpha on obesity by estrogen. *Obesity (Silver Spring, Md.)* **15**, 1430-1440 (2007).

40. D. Ferrara, F. Montecucco, F. Dallegri, F. Carbone, Impact of different ectopic fat depots on cardiovascular and metabolic diseases. *J Cell Physiol* **234**, 21630-21641 (2019).
41. M. Bordicchia, D. Liu, E. Z. Amri, G. Ailhaud, P. Dessi-Fulgheri, C. Zhang, N. Takahashi, R. Sarzani, S. Collins, Cardiac natriuretic peptides act via p38 MAPK to induce the brown fat thermogenic program in mouse and human adipocytes. *J Clin Invest* **122**, 1022-1036 (2012).
42. J. Robidoux, W. Cao, H. Quan, K. W. Daniel, F. Moukdar, X. Bai, L. M. Floering, S. Collins, Selective activation of mitogen-activated protein (MAP) kinase kinase 3 and p38alpha MAP kinase is essential for cyclic AMP-dependent UCP1 expression in adipocytes. *Mol Cell Biol* **25**, 5466-5479 (2005).
43. S. C. Souza, M. D. Chau, Q. Yang, M. S. Gauthier, K. B. Clairmont, Z. Wu, J. Gromada, W. P. Dole, Atrial natriuretic peptide regulates lipid mobilization and oxygen consumption in human adipocytes by activating AMPK. *Biochem Biophys Res Commun* **410**, 398-403 (2011).
44. M. Yoon, The role of PPARalpha in lipid metabolism and obesity: focusing on the effects of estrogen on PPARalpha actions. *Pharmacological research : the official journal of the Italian Pharmacological Society* **60**, 151-159 (2009).
45. H. Keller, F. Givel, M. Perroud, W. Wahli, Signaling cross-talk between peroxisome proliferator-activated receptor/retinoid X receptor and estrogen receptor through estrogen response elements. *Molecular endocrinology (Baltimore, Md.)* **9**, 794-804 (1995).
46. L. B. Jeng, B. K. Velmurugan, H. H. Hsu, S. Y. Wen, C. Y. Shen, C. H. Lin, Y. M. Lin, R. J. Chen, W. W. Kuo, C. Y. Huang, Fenofibrate induced PPAR alpha expression was attenuated by oestrogen receptor alpha overexpression in Hep3B cells. *Environ Toxicol* **33**, 234-247 (2018).

47. L. H. Puckey, B. L. Knight, Interaction of oestrogen and peroxisome proliferator-activated receptors with apolipoprotein(a) gene enhancers. *Biochem J* **366**, 157-163 (2002).
48. T. Nakamura, G. Zhu, M. J. Ranek, K. Kokkonen-Simon, M. Zhang, G. E. Kim, K. Tsujita, D. A. Kass, Prevention of PKG-1 $\alpha$  Oxidation Suppresses Antihypertrophic/Antifibrotic Effects From PDE5 Inhibition but not sGC Stimulation. *Circ Heart Fail* **11**, e004740 (2018).
49. E. Takimoto, N. Koitabashi, S. Hsu, E. A. Ketner, T. Nagayama, D. Bedja, K. Gabrielson, R. Blanton, D. P. Siderovski, M. E. Mendelsohn, D. A. Kass, RGS2 mediates cardiac compensation to pressure-overload and anti-hypertrophic effects of PDE5 inhibition. *J Clin Invest* **119**, 408-420 (2009).
50. H. Kinoshita, K. Kuwahara, M. Nishida, Z. Jian, X. Rong, S. Kiyonaka, Y. Kuwabara, H. Kurose, R. Inoue, Y. Mori, Y. Li, Y. Nakagawa, S. Usami, M. Fujiwara, Y. Yamada, T. Minami, K. Ueshima, K. Nakao, Inhibition of TRPC6 channel activity contributes to the antihypertrophic effects of natriuretic peptides-guanylyl cyclase-A signaling in the heart. *Circ.Res.* **106**, 1849-1860 (2010).
51. M. J. Ranek, K. M. Kokkonen-Simon, A. Chen, B. L. Dunkerly-Eyring, M. P. Vera, C. U. Oeing, C. H. Patel, T. Nakamura, G. Zhu, D. Bedja, M. Sasaki, R. J. Holewinski, J. E. Van Eyk, J. D. Powell, D. I. Lee, D. A. Kass, PKG1-modified TSC2 regulates mTORC1 activity to counter adverse cardiac stress. *Nature* **566**, 264-269 (2019).
52. C. Moro, M. Lafontan, Natriuretic peptides and cGMP signaling control of energy homeostasis. *Am J Physiol Heart Circ Physiol* **304**, H358-368 (2013).
53. N. Schlueter, A. de Sterke, D. M. Willmes, J. Spranger, J. Jordan, A. L. Birkenfeld, Metabolic actions of natriuretic peptides and therapeutic potential in the metabolic syndrome. *Pharmacology & therapeutics* **144**, 12-27 (2014).
54. A. Sanyal, J. Naumann, L. S. Hoffmann, A. Chabowska-Kita, A. Ehlund, A. Schlitzer, P. Arner, M. Blüher, A. Pfeifer, Interplay between Obesity-Induced

- Inflammation and cGMP Signaling in White Adipose Tissue. *Cell Rep* **18**, 225-236 (2017).
55. I. J. Neeland, B. R. Winders, C. R. Ayers, S. R. Das, A. Y. Chang, J. D. Berry, A. Khera, D. K. McGuire, G. L. Vega, J. A. de Lemos, A. T. Turer, Higher natriuretic peptide levels associate with a favorable adipose tissue distribution profile. *J Am Coll Cardiol* **62**, 752-760 (2013).
56. W. Wu, F. Shi, D. Liu, R. P. Ceddia, R. Gaffin, W. Wei, H. Fang, E. D. Lewandowski, S. Collins, Enhancing natriuretic peptide signaling in adipose tissue, but not in muscle, protects against diet-induced obesity and insulin resistance. *Science signaling* **10**, (2017).
57. K. Verboven, D. Hansen, C. Moro, B. O. Eijnde, N. Hoebbers, J. Knol, W. Bouckaert, A. Dams, E. E. Blaak, J. W. Jocken, Attenuated atrial natriuretic peptide-mediated lipolysis in subcutaneous adipocytes of obese type 2 diabetic men. *Clinical science (London, England : 1979)* **130**, 1105-1114 (2016).
58. S. Jeong, M. Han, H. Lee, M. Kim, J. Kim, C. J. Nicol, B. H. Kim, J. H. Choi, K. H. Nam, G. T. Oh, M. Yoon, Effects of fenofibrate on high-fat diet-induced body weight gain and adiposity in female C57BL/6J mice. *Metabolism* **53**, 1284-1289 (2004).
59. E. Brown, J. P. H. Wilding, T. M. Barber, U. Alam, D. J. Cuthbertson, Weight loss variability with SGLT2 inhibitors and GLP-1 receptor agonists in type 2 diabetes mellitus and obesity: Mechanistic possibilities. *Obesity reviews : an official journal of the International Association for the Study of Obesity* **20**, 816-828 (2019).
60. M. Packer, S. D. Anker, J. Butler, G. Filippatos, S. J. Pocock, P. Carson, J. Januzzi, S. Verma, H. Tsutsui, M. Brueckmann, W. Jamal, K. Kimura, J. Schnee, C. Zeller, D. Cotton, E. Bocchi, M. Böhm, D. J. Choi, V. Chopra, E. Chuquiure, N. Giannetti, S. Janssens, J. Zhang, J. R. Gonzalez Juanatey, S. Kaul, H. P. Brunner-La Rocca, B. Merkely, S. J. Nicholls, S. Perrone, I. Pina, P. Ponikowski,



- N. Sattar, M. Senni, M. F. Seronde, J. Spinar, I. Squire, S. Taddei, C. Wanner, F. Zannad, Cardiovascular and Renal Outcomes with Empagliflozin in Heart Failure. *N Engl J Med* **383**, 1413-1424 (2020).
61. M. J. Pereira, J. W. Eriksson, Emerging Role of SGLT-2 Inhibitors for the Treatment of Obesity. *Drugs* **79**, 219-230 (2019).
62. S. D. Solomon, J. J. V. McMurray, I. S. Anand, J. Ge, C. S. P. Lam, A. P. Maggioni, F. Martinez, M. Packer, M. A. Pfeffer, B. Pieske, M. M. Redfield, J. L. Rouleau, D. J. van Veldhuisen, F. Zannad, M. R. Zile, A. S. Desai, B. Claggett, P. S. Jhund, S. A. Boytsov, J. Comin-Colet, J. Cleland, H. D. Düngen, E. Goncalvesova, T. Katova, J. F. Kerr Saraiva, M. Lelonek, B. Merkely, M. Senni, S. J. Shah, J. Zhou, A. R. Rizkala, J. Gong, V. C. Shi, M. P. Lefkowitz, Angiotensin-Neprilysin Inhibition in Heart Failure with Preserved Ejection Fraction. *N Engl J Med* **381**, 1609-1620 (2019).
63. H. Nougé, T. Pezel, F. Picard, M. Sadoune, M. Arrigo, F. Beauvais, J. M. Launay, A. Cohen-Solal, N. Vodovar, D. Logeart, Effects of sacubitril/valsartan on neprilysin targets and the metabolism of natriuretic peptides in chronic heart failure: a mechanistic clinical study. *Eur J Heart Fail* **21**, 598-605 (2019).
64. D. Croteau, F. Qin, J. M. Chambers, E. Kallick, I. Luptak, M. Panagia, D. R. Pimentel, D. A. Siwik, W. S. Colucci, Differential Effects of Sacubitril/Valsartan on Diastolic Function in Mice With Obesity-Related Metabolic Heart Disease. *JACC. Basic to translational science* **5**, 916-927 (2020).
65. R. Stinkens, B. W. van der Kolk, J. Jordan, T. Jax, S. Engeli, T. Heise, J. W. Jocken, M. May, C. Schindler, B. Havekes, N. Schaper, D. Albrecht, S. Kaiser, N. Hartmann, M. Letzkus, T. H. Langenickel, G. H. Goossens, E. E. Blaak, The effects of angiotensin receptor neprilysin inhibition by sacubitril/valsartan on adipose tissue transcriptome and protein expression in obese hypertensive patients. *Scientific reports* **8**, 3933 (2018).

66. R. P. Ceddia, D. Liu, F. Shi, S. Mishra, K. D.A., S. Collins, in *EMBO Workshop: Organ crosstalk in energy balance and metabolic disease*. (Chiclana de la Frontera, Spain, 2019), pp. Abstract 82.

## **Acknowledgements:**

The authors thank the Rodent Metabolism Core at the Center for Metabolism and Obesity Research (JHUSOM) for indirect calorimetry and GTT, Phenotyping Core for MRI body composition analysis, Small Animal CV Phenotyping and Models Core for echocardiography imaging and analysis and pressure-overload surgery, JHU Imaging Core for electron microscopy slide preparation, JHU Deep Sequencing and Microarray Core Facility for sequencing. The study was supported by: NIH R35-HL135827, RO1-HL-119012, P01HL10715, and AHA 16SFRN28620000 (DAK), NIH DK084171 (GWW), NIH-RO1-HL134821 (BOR), NIH T32-HL007227 (VSH), 16SFRN27870000 (KS), DK116625, AHA 16SFRN28620000 (SC), 16SFRN28420002 (DDS), F32 DK-116520 (RPC), and OE 688/1-1 (CUO). PF-04447943 was provided by Pfizer Inc. under a material transfer agreement.

## **Disclosures:**

Drs. Kass and Mishra are co-inventors on a pending PCT submitted by Johns Hopkins on PDE9inhibitors for the treatment of cardiometabolic disorders and obesity.
